# Supplementary material for: Traditional Chinese Medicine Tanreqing Inhibits Quorum Sensing Systems in Pseudomonas aeruginosa
Source: Front Microbiol. 2020 Dec 17;11:517462. doi: 10.3389/fmicb.2020.517462 (PMC7775676; doi:10.3389/fmicb.2020.517462)
Supplement: Supplementary Table 1 — TRQ-treated P. aeruginosa regulon in exponential growth phase. [file Table_1.xlsx]

## Sheet: TRQ-EXP
PA no.a	Geneb	FCc	P value	Protein descriptiond	Functional classificatione
PA4211	phzB1	-5.77611	6.19099e-67	Probable phenazine biosynthesis protein	Secreted Factors (toxins, enzymes, alginate)
PA3361	lecB	-5.55431	5.38086e-67	Fucose-binding lectin PA-IIL	Motility & Attachment
PA4217	phzS	-4.2509	8.96794e-47	Flavin-containing monooxygenase	Putative enzymes
PA0998	pqsC	-4.2051	2.59391e-45	PqsC	Biosynthesis of cofactors, prosthetic groups and carriers
PA4133		-4.19925	1.78528e-47	Cytochrome c oxidase subunit (cbb3-type)	Energy metabolism
PA0997	pqsB	-4.10048	2.37363e-44	PqsB	Biosynthesis of cofactors, prosthetic groups and carriers
PA0999	pqsD	-4.06958	1.71049e-44	3-oxoacyl-[acyl-carrier-protein] synthase III	Biosynthesis of cofactors, prosthetic groups and carriers
PA4134		-4.05154	2.58277e-42	Hypothetical protein	Hypothetical, unclassified, unknown
PA1902	phzD2	-3.95349	2.28107e-41	Phenazine biosynthesis protein PhzD	Secreted Factors (toxins, enzymes, alginate)
PA4213	phzD1	-3.95349	2.28107e-41	Phenazine biosynthesis protein PhzD	Secreted Factors (toxins, enzymes, alginate)
PA1903	phzE2	-3.86815	3.54369e-41	Phenazine biosynthesis protein PhzE	Secreted Factors (toxins, enzymes, alginate)
PA4214	phzE1	-3.86815	3.54369e-41	Phenazine biosynthesis protein PhzE	Secreted Factors (toxins, enzymes, alginate)
PA1000	pqsE	-3.84337	1.66892e-40	Quinolone signal response protein	Biosynthesis of cofactors, prosthetic groups and carriers
PA1904	phzF2	-3.73521	4.13482e-38	Probable phenazine biosynthesis protein	Secreted Factors (toxins, enzymes, alginate)
PA4215	phzF1	-3.73521	4.13482e-38	Probable phenazine biosynthesis protein	Secreted Factors (toxins, enzymes, alginate)
PA4209	phzM	-3.72005	2.62608e-38	Probable phenazine-specific methyltransferase	Putative enzymes
PA3479	rhlA	-3.69717	1.89054e-38	Rhamnosyltransferase chain A	Secreted Factors (toxins, enzymes, alginate)
PA0122	rahU	-3.62104	6.90015e-38	RahU	Hypothetical, unclassified, unknown
PA4210	phzA1	-3.61463	1.89585e-24	Probable phenazine biosynthesis protein	Secreted Factors (toxins, enzymes, alginate)
PA3328		-3.58048	2.60342e-36	Probable FAD-dependent monooxygenase	Putative enzymes
PA1001	phnA	-3.53836	1.17484e-35	Anthranilate synthase component I	Adaptation, Protection
PA2570	lecA	-3.53284	1.36496e-30	LecA	Adaptation, Protection ; Motility & Attachment ; Cell wall / LPS / capsule
PA3334	acp3	-3.45362	4.55003e-32	Acp3	Fatty acid and phospholipid metabolism
PA4216	phzG1	-3.40016	1.06877e-32	Probable pyridoxamine 5'-phosphate oxidase	Secreted Factors (toxins, enzymes, alginate)
PA0996	pqsA	-3.35424	5.15794e-33	PqsA	Biosynthesis of cofactors, prosthetic groups and carriers
PA3327		-3.31887	1.58305e-33	Probable non-ribosomal peptide synthetase	Adaptation, Protection
PA3329		-3.30624	4.99238e-32	Hypothetical protein	Hypothetical, unclassified, unknown
PA1905	phzG2	-3.28254	6.15728e-31	Probable pyridoxamine 5'-phosphate oxidase	Secreted Factors (toxins, enzymes, alginate)
PA3332		-3.279	3.83469e-31	Conserved hypothetical protein	Hypothetical, unclassified, unknown
PA3331		-3.26273	3.89877e-32	Cytochrome P450	Adaptation, Protection ; Carbon compound catabolism
PA1900	phzB2	-3.2373	9.93888e-29	Probable phenazine biosynthesis protein	Secreted Factors (toxins, enzymes, alginate)
PA0211	mdcD	-3.23213	6.46704e-30	Malonate decarboxylase beta subunit	Carbon compound catabolism
PA3330		-3.23044	3.04705e-31	Probable short chain dehydrogenase	Putative enzymes
PA3333	fabH2	-3.21884	8.0205e-31	3-oxoacyl-[acyl-carrier-protein] synthase III	Fatty acid and phospholipid metabolism
PA3478	rhlB	-3.20396	9.6228e-31	Rhamnosyltransferase chain B	Secreted Factors (toxins, enzymes, alginate)
PA0212	mdcE	-3.08704	2.80003e-27	Malonate decarboxylase gamma subunit	Carbon compound catabolism
PA0534	pauB1	-2.96986	4.87712e-28	FaD-dependent oxidoreductase	Putative enzymes
PA3335		-2.95647	2.13423e-26	Hypothetical protein	Hypothetical, unclassified, unknown
PA1002	phnB	-2.95197	1.21784e-25	Anthranilate synthase component II	Amino acid biosynthesis and metabolism ; Adaptation, Protection
PA4212	phzC1	-2.94406	1.34135e-27	Phenazine biosynthesis protein PhzC	Secreted Factors (toxins, enzymes, alginate)
PA2069		-2.77932	3.23729e-23	Probable carbamoyl transferase	Putative enzymes
PA0209		-2.77372	1.0533e-22	Conserved hypothetical protein	Putative enzymes
PA1901	phzC2	-2.77316	3.65623e-25	Phenazine biosynthesis protein PhzC	Secreted Factors (toxins, enzymes, alginate)
PA0213		-2.71916	4.55801e-21	Hypothetical protein	Carbon compound catabolism
PA0210	mdcC	-2.71336	1.2484e-19	Malonate decarboxylase delta subunit	Carbon compound catabolism
PA0214		-2.68507	1.1122e-21	Probable acyl transferase	Carbon compound catabolism
PA2300	chiC	-2.59687	2.89186e-21	Chitinase	Carbon compound catabolism
PA2068		-2.58204	4.39478e-19	Probable major facilitator superfamily (MFS) transporter	Membrane proteins ; Transport of small molecules
PA1216		-2.55224	3.5051e-20	Hypothetical protein	Hypothetical, unclassified, unknown
PA1217		-2.54722	1.20795e-20	Probable 2-isopropylmalate synthase	Amino acid biosynthesis and metabolism
PA1914		-2.53187	1.07795e-20	Conserved hypothetical protein	Putative enzymes
PA4130		-2.48621	1.67048e-21	Probable sulfite or nitrite reductase	Central intermediary metabolism
PA1289		-2.47413	5.48745e-20	Hypothetical protein	Hypothetical, unclassified, unknown
PA4141		-2.47325	6.2016e-21	Hypothetical protein	Hypothetical, unclassified, unknown
PA0535		-2.4392	4.92279e-20	Probable transcriptional regulator	Transcriptional regulators
PA2195	hcnC	-2.42155	2.19146e-20	Hydrogen cyanide synthase HcnC	Central intermediary metabolism
PA1869	acp1	-2.36805	1.14001e-15	Acp1	Fatty acid and phospholipid metabolism
PA3336		-2.3658	9.30293e-19	Probable major facilitator superfamily (MFS) transporter	Membrane proteins ; Transport of small molecules
PA3431		-2.3505	5.50625e-17	Conserved hypothetical protein	Membrane proteins
PA0447	gcdH	-2.3475	8.65057e-20	Glutaryl-CoA dehydrogenase	Fatty acid and phospholipid metabolism ; Amino acid biosynthesis and metabolism ; Carbon compound catabolism
PA2193	hcnA	-2.34218	6.18542e-18	Hydrogen cyanide synthase HcnA	Central intermediary metabolism
PA2565		-2.3309	1.71688e-18	Hypothetical protein	Hypothetical, unclassified, unknown
PA4131		-2.31798	2.49879e-19	Probable iron-sulfur protein	Putative enzymes
PA2564		-2.30604	7.28805e-19	Hypothetical protein	Hypothetical, unclassified, unknown
PA1218		-2.30458	8.20019e-16	Hypothetical protein	Hypothetical, unclassified, unknown
PA2566		-2.27941	1.54979e-18	Conserved hypothetical protein	Hypothetical, unclassified, unknown
PA3734		-2.278	1.6339e-15	Hypothetical protein	Hypothetical, unclassified, unknown
PA3520		-2.24222	3.02734e-13	Hypothetical protein	Hypothetical, unclassified, unknown
PA2194	hcnB	-2.23091	5.2073e-18	Hydrogen cyanide synthase HcnB	Central intermediary metabolism
PA4648	cupE1	-2.20374	2.80609e-17	Pilin subunit CupE1	Hypothetical, unclassified, unknown
PA3432		-2.19642	8.49734e-14	Hypothetical protein	Membrane proteins
PA4377		-2.179	5.98764e-17	Hypothetical protein	Hypothetical, unclassified, unknown
PA1215		-2.16328	3.19067e-15	Hypothetical protein	Hypothetical, unclassified, unknown
PA4129		-2.12918	1.10715e-16	Hypothetical protein	Hypothetical, unclassified, unknown
PA3326	clpP2	-2.1287	6.90908e-17	ClpP2	Translation, post-translational modification, degradation
PA5220		-2.11347	2.10937e-16	Hypothetical protein	Hypothetical, unclassified, unknown
PA1899	phzA2	-2.10567	1.6777e-10	Probable phenazine biosynthesis protein	Secreted Factors (toxins, enzymes, alginate)
PA1214		-2.08943	5.05985e-14	Hypothetical protein	Hypothetical, unclassified, unknown
PA4078		-2.08664	3.72804e-16	Probable nonribosomal peptide synthetase	Adaptation, Protection
PA1871	lasA	-2.04716	5.84957e-16	LasA protease precursor	Secreted Factors (toxins, enzymes, alginate) ; Translation, post-translational modification, degradation
PA0176	aer2	-1.99414	2.44507e-15	Aerotaxis transducer Aer2	Adaptation, Protection ; Chemotaxis
PA0175		-1.97635	1.03585e-14	Probable chemotaxis protein methyltransferase	Transcriptional regulators ; Adaptation, Protection ; Chemotaxis
PA4649	cupE2	-1.93832	5.70598e-12	Pilin subunit CupE2	Hypothetical, unclassified, unknown
PA4132		-1.91074	2.58354e-14	Conserved hypothetical protein	Hypothetical, unclassified, unknown
PA4306	flp	-1.89464	3.9848e-14	Type IVb pilin, Flp	Motility & Attachment
PA1219		-1.86039	4.9872e-09	Hypothetical protein	Hypothetical, unclassified, unknown
PA0178		-1.84897	1.37008e-13	Probable two-component sensor	Chemotaxis ; Adaptation, Protection ; Two-component regulatory systems
PA0177		-1.8475	1.83438e-13	Probable purine-binding chemotaxis protein	Adaptation, Protection ; Chemotaxis
PA3417		-1.83497	1.99698e-13	Probable pyruvate dehydrogenase E1 component, alpha subunit	Energy metabolism
PA0208	mdcA	-1.81868	2.72549e-13	Malonate decarboxylase alpha subunit	Carbon compound catabolism
PA1130	rhlC	-1.80175	1.15101e-12	Rhamnosyltransferase 2	Cell wall / LPS / capsule ; Adaptation, Protection
PA1874		-1.80108	4.12536e-13	Hypothetical protein	Hypothetical, unclassified, unknown ; Antibiotic resistance and susceptibility
PA0446		-1.79735	3.80673e-13	Conserved hypothetical protein	Hypothetical, unclassified, unknown
PA0174		-1.7949	5.27727e-12	Conserved hypothetical protein	Hypothetical, unclassified, unknown
PA2939		-1.70792	3.81363e-12	Probable aminopeptidase	Secreted Factors (toxins, enzymes, alginate)
PA1220		-1.69827	1.02088e-09	Hypothetical protein	Hypothetical, unclassified, unknown
PA1888		-1.67582	8.42782e-12	Hypothetical protein	Hypothetical, unclassified, unknown
PA0746		-1.67418	1.09713e-11	Probable acyl-CoA dehydrogenase	Putative enzymes
PA3724	lasB	-1.66865	9.09278e-12	Elastase LasB	Secreted Factors (toxins, enzymes, alginate) ; Translation, post-translational modification, degradation
PA0745	dspI	-1.66259	1.28097e-11	DspI	Putative enzymes
PA2330		-1.66133	2.89143e-11	Hypothetical protein	Hypothetical, unclassified, unknown
PA0852.1		-1.64669	2.0525e-11	Uncharacterized protein
PA1149		-1.6431	0.000426637	Hypothetical protein	Hypothetical, unclassified, unknown
PA1131		-1.62549	1.4812e-10	Probable major facilitator superfamily (MFS) transporter	Membrane proteins ; Antibiotic resistance and susceptibility ; Transport of small molecules
PA2329		-1.62278	2.77633e-10	Probable ATP-binding component of ABC transporter	Transport of small molecules
PA4142		-1.61924	4.07673e-10	Probable secretion protein	Protein secretion/export apparatus
PA2371	clpV3	-1.61229	4.22031e-11	ClpV3	Translation, post-translational modification, degradation
PA4651	cupE4	-1.60916	1.92376e-10	Pilin assembly chaperone CupE4	Motility & Attachment ; Chaperones & heat shock proteins
PA1877		-1.60885	1.11074e-10	Probable secretion protein	Protein secretion/export apparatus ; Antibiotic resistance and susceptibility
PA1875		-1.60866	6.37639e-11	Probable outer membrane protein precursor	Protein secretion/export apparatus ; Hypothetical, unclassified, unknown ; Antibiotic resistance and susceptibility
PA0852	cbpD	-1.59585	5.8153e-11	Chitin-binding protein CbpD precursor	Secreted Factors (toxins, enzymes, alginate)
PA1213		-1.58958	8.58328e-08	Hypothetical protein	Hypothetical, unclassified, unknown
PA4650	cupE3	-1.57031	5.12452e-08	Pilin subunit CupE3	Hypothetical, unclassified, unknown
PA2372		-1.56449	1.1947e-10	Hypothetical protein	Hypothetical, unclassified, unknown
PA4293	pprA	-1.55449	1.97355e-10	Two-component sensor PprA	Two-component regulatory systems ; Antibiotic resistance and susceptibility
PA2573		-1.5543	1.49823e-10	Probable chemotaxis transducer	Adaptation, Protection ; Chemotaxis
PA4384		-1.55046	2.26532e-08	Hypothetical protein	Hypothetical, unclassified, unknown
PA1887		-1.54014	3.03935e-10	Hypothetical protein	Hypothetical, unclassified, unknown
PA0744		-1.53781	2.28417e-10	Probable enoyl-CoA hydratase/isomerase	Putative enzymes
PA4298		-1.53766	5.89497e-09	Hypothetical protein	Hypothetical, unclassified, unknown
PA2328		-1.51322	2.18358e-09	Hypothetical protein	Hypothetical, unclassified, unknown
PA4638		-1.51134	2.85804e-09	Hypothetical protein	Hypothetical, unclassified, unknown
PA0215		-1.51085	2.18448e-08	Malonate transporter MadL	Membrane proteins ; Transport of small molecules
PA1212		-1.50658	1.20613e-07	Probable major facilitator superfamily (MFS) transporter	Membrane proteins ; Transport of small molecules
PA4300	tadC	-1.49013	1.36945e-09	TadC	Membrane proteins ; Motility & Attachment
PA3022		-1.48791	8.47773e-10	Hypothetical protein	Hypothetical, unclassified, unknown
PA0632		-1.4824	4.21896e-08	Hypothetical protein	Related to phage, transposon, or plasmid
PA3418	ldh	-1.48038	6.60102e-10	Leucine dehydrogenase	Amino acid biosynthesis and metabolism
PA3416		-1.47319	9.2958e-10	Probable pyruvate dehydrogenase E1 component, beta chain	Energy metabolism
PA1930		-1.46802	1.05208e-09	Probable chemotaxis transducer	Adaptation, Protection ; Chemotaxis
PA0614		-1.46141	3.14476e-08	Hypothetical protein	Hypothetical, unclassified, unknown
PA2331		-1.46056	4.16903e-09	Hypothetical protein	Membrane proteins
PA0713		-1.45567	1.17014e-09	Hypothetical protein	Hypothetical, unclassified, unknown
PA4302	tadA	-1.43425	2.88314e-09	TadA ATPase	Protein secretion/export apparatus ; Motility & Attachment
PA1876		-1.43175	2.75085e-09	Probable ATP-binding/permease fusion ABC transporter	Secreted Factors (toxins, enzymes, alginate) ; Protein secretion/export apparatus ; Transport of small molecules ; Antibiotic resistance and susceptibility
PA0179		-1.42616	2.39469e-09	Probable two-component response regulator	Chemotaxis ; Adaptation, Protection ; Two-component regulatory systems
PA2370	hsiH3	-1.41912	4.47887e-09	HsiH3	Hypothetical, unclassified, unknown
PA3930	cioA	-1.41893	3.3694e-09	Cyanide insensitive terminal oxidase	Energy metabolism
PA3928		-1.41444	2.7667e-08	Hypothetical protein	Hypothetical, unclassified, unknown
PA0173		-1.41295	1.89391e-08	Probable methylesterase	Adaptation, Protection ; Chemotaxis
PA0952		-1.409	3.11566e-08	Hypothetical protein	Hypothetical, unclassified, unknown
PA0747		-1.40737	5.29966e-09	Probable aldehyde dehydrogenase	Putative enzymes
PA3049	rmf	-1.40369	3.63714e-09	Ribosome modulation factor	Translation, post-translational modification, degradation
PA1221		-1.40092	2.07892e-07	Hypothetical protein	Hypothetical, unclassified, unknown
PA4986		-1.39628	2.3147e-08	Probable oxidoreductase	Putative enzymes
PA0830		-1.39081	6.1974e-09	Hypothetical protein	Hypothetical, unclassified, unknown
PA2067		-1.38747	1.15104e-07	Probable hydrolase	Putative enzymes
PA1177	napE	-1.38198	1.44599e-08	Periplasmic nitrate reductase protein NapE	Energy metabolism
PA2368	hsiF3	-1.38029	1.24941e-08	HsiF3	Hypothetical, unclassified, unknown
PA1730		-1.37964	8.77209e-09	Conserved hypothetical protein	Hypothetical, unclassified, unknown
PA5446		-1.37594	7.68427e-09	Hypothetical protein	Hypothetical, unclassified, unknown
PA4352		-1.37409	7.32722e-09	Conserved hypothetical protein	Hypothetical, unclassified, unknown
PA4301	tadB	-1.37317	1.63563e-08	TadB	Membrane proteins ; Motility & Attachment
PA2369	hsiG3	-1.37082	9.17287e-09	HsiG3	Membrane proteins
PA3415		-1.36627	1.25371e-08	Probable dihydrolipoamide acetyltransferase	Energy metabolism
PA0631		-1.36376	1.202e-07	Hypothetical protein	Related to phage, transposon, or plasmid
PA5460		-1.35893	1.45674e-06	Hypothetical protein	Hypothetical, unclassified, unknown
PA0628		-1.34899	1.28273e-08	Conserved hypothetical protein	Related to phage, transposon, or plasmid
PA4573		-1.34748	1.95109e-08	Hypothetical protein	Hypothetical, unclassified, unknown
PA2161		-1.34382	1.63701e-06	Hypothetical protein	Hypothetical, unclassified, unknown
PA0629		-1.3434	2.79125e-08	Conserved hypothetical protein	Related to phage, transposon, or plasmid
PA0640		-1.3323	3.06585e-08	Probable bacteriophage protein	Related to phage, transposon, or plasmid
PA4523		-1.33204	1.63089e-08	Hypothetical protein	Hypothetical, unclassified, unknown
PA2360	hsiA3	-1.33106	2.57036e-08	Hypothetical protein	Hypothetical, unclassified, unknown
PA2423		-1.32738	5.11679e-08	Hypothetical protein	Hypothetical, unclassified, unknown
PA1176	napF	-1.31685	3.37195e-08	Ferredoxin protein NapF	Energy metabolism
PA2362	dotU3	-1.31521	1.24873e-07	DotU3	Hypothetical, unclassified, unknown
PA0639		-1.29522	5.18757e-08	Conserved hypothetical protein	Related to phage, transposon, or plasmid
PA4299	tadD	-1.29471	6.96226e-08	TadD	Motility & Attachment
PA2937		-1.28502	8.86135e-08	Hypothetical protein	Hypothetical, unclassified, unknown
PA0052		-1.28191	8.53628e-08	Hypothetical protein	Hypothetical, unclassified, unknown
PA3451		-1.28169	1.50963e-07	Hypothetical protein	Hypothetical, unclassified, unknown
PA4303	tadZ	-1.27661	7.54634e-08	TadZ	Motility & Attachment
PA0635		-1.27444	1.12074e-07	Hypothetical protein	Related to phage, transposon, or plasmid
PA3042		-1.27256	6.58434e-08	Hypothetical protein	Hypothetical, unclassified, unknown
PA2367	hcp3	-1.25833	9.12376e-08	Hcp3	Hypothetical, unclassified, unknown
PA0638		-1.25446	1.41201e-07	Probable bacteriophage protein	Related to phage, transposon, or plasmid
PA0788		-1.2477	1.0199e-07	Hypothetical protein	Hypothetical, unclassified, unknown
PA0637		-1.24121	3.09268e-07	Conserved hypothetical protein	Related to phage, transposon, or plasmid
PA0630		-1.23765	5.49111e-07	Hypothetical protein	Related to phage, transposon, or plasmid
PA1355		-1.22611	4.37198e-06	Hypothetical protein	Hypothetical, unclassified, unknown
PA0845	cerN	-1.22595	5.7081e-06	CerN	Hypothetical, unclassified, unknown
PA1784		-1.22081	3.26978e-07	Hypothetical protein	Hypothetical, unclassified, unknown
PA3929	cioB	-1.21948	2.04332e-07	Cyanide insensitive terminal oxidase	Energy metabolism
PA0451		-1.21923	2.00166e-07	Conserved hypothetical protein	Membrane proteins
PA2365	hsiB3	-1.21787	2.6219e-07	HsiB3	Hypothetical, unclassified, unknown
PA1728		-1.21752	2.2044e-07	Hypothetical protein	Hypothetical, unclassified, unknown
PA0627		-1.21425	1.3244e-06	Conserved hypothetical protein	Related to phage, transposon, or plasmid
PA0007		-1.21216	1.96111e-07	Hypothetical protein	Membrane proteins
PA0320	carO	-1.2055	6.1866e-06	Calcium-regulated OB-fold protein CarO	Hypothetical, unclassified, unknown
PA3858		-1.20422	2.91683e-07	Probable amino acid-binding protein	Transport of small molecules
PA2636		-1.19631	0.000965074	Hypothetical protein	Hypothetical, unclassified, unknown
PA3957		-1.19328	5.21699e-07	Probable short-chain dehydrogenase	Putative enzymes
PA4607		-1.19325	2.26802e-07	Hypothetical protein	Hypothetical, unclassified, unknown
PA4305	rcpC	-1.1931	3.67998e-07	RcpC	Motility & Attachment
PA0636		-1.1902	2.4639e-07	Hypothetical protein	Related to phage, transposon, or plasmid
PA2361	icmF3	-1.18865	3.43681e-07	IcmF3	Hypothetical, unclassified, unknown
PA0625		-1.18176	2.23818e-07	Hypothetical protein	Related to phage, transposon, or plasmid
PA5101		-1.17662	7.38775e-07	Hypothetical protein	Hypothetical, unclassified, unknown
PA0849	trxB2	-1.17334	9.34108e-07	Thioredoxin reductase 2	Nucleotide biosynthesis and metabolism
PA4304	rcpA	-1.16536	6.0541e-07	RcpA	Protein secretion/export apparatus ; Motility & Attachment
PA5172	arcB	-1.16295	4.43486e-07	Ornithine carbamoyltransferase, catabolic	Amino acid biosynthesis and metabolism
PA0483		-1.15657	1.10595e-06	Probable acetyltransferase	Putative enzymes
PA0626		-1.15551	5.63656e-07	Hypothetical protein	Related to phage, transposon, or plasmid
PA2513	antB	-1.14786	3.27549e-05	Anthranilate dioxygenase small subunit	Carbon compound catabolism
PA5219		-1.14012	7.09171e-06	Hypothetical protein	Membrane proteins
PA3424		-1.12166	2.58522e-06	Hypothetical protein	Hypothetical, unclassified, unknown
PA2171		-1.11926	1.80056e-06	Hypothetical protein	Hypothetical, unclassified, unknown
PA2226	qsrO	-1.11139	5.3731e-06	QsrO	Hypothetical, unclassified, unknown
PA0634		-1.11056	1.72285e-06	Hypothetical protein	Related to phage, transposon, or plasmid
PA3311	nbdA	-1.108	1.74113e-06	NbdA	Membrane proteins
PA0633		-1.10633	1.19504e-06	Hypothetical protein	Related to phage, transposon, or plasmid
PA0714		-1.1042	6.94933e-06	Hypothetical protein	Hypothetical, unclassified, unknown
PA3995		-1.10264	2.74607e-06	Probable transcriptional regulator	Transcriptional regulators
PA5326	sphD	-1.10257	2.44988e-05	SphD	Hypothetical, unclassified, unknown
PA2504		-1.0979	1.81499e-06	Hypothetical protein	Hypothetical, unclassified, unknown
PA2474		-1.09687	0.00820248	Hypothetical protein	Hypothetical, unclassified, unknown
PA3040		-1.09133	1.91593e-06	Conserved hypothetical protein	Hypothetical, unclassified, unknown
PA2364	lip3	-1.09122	2.97138e-06	Lip3	Hypothetical, unclassified, unknown
PA4925		-1.08739	3.29525e-06	Conserved hypothetical protein	Hypothetical, unclassified, unknown
PA4915		-1.08704	2.07043e-06	Probable chemotaxis transducer	Adaptation, Protection ; Chemotaxis
PA2001	atoB	-1.08621	1.91362e-06	Acetyl-CoA acetyltransferase	Central intermediary metabolism ; Fatty acid and phospholipid metabolism
PA5171	arcA	-1.0812	2.0933e-06	Arginine deiminase	Amino acid biosynthesis and metabolism
PA2196		-1.07627	1.1935e-05	TetR family transcriptional regulator	Transcriptional regulators
PA4062		-1.07591	0.000134021	Hypothetical protein	Hypothetical, unclassified, unknown
PA0624		-1.07261	2.41581e-06	Hypothetical protein	Related to phage, transposon, or plasmid
PA4542	clpB	-1.06992	2.42755e-06	ClpB protein	Translation, post-translational modification, degradation
PA1175	napD	-1.0666	4.0534e-06	NapD protein of periplasmic nitrate reductase	Energy metabolism
PA0617		-1.06654	5.66586e-06	Probable bacteriophage protein	Related to phage, transposon, or plasmid
PA2066		-1.06144	4.75088e-05	Hypothetical protein	Hypothetical, unclassified, unknown
PA4781		-1.06079	3.83944e-06	Cyclic di-GMP phosphodiesterase	Transcriptional regulators ; Two-component regulatory systems ; Motility & Attachment ; Cell wall / LPS / capsule
PA0641		-1.05671	2.37465e-06	Probable bacteriophage protein	Related to phage, transposon, or plasmid
PA4294		-1.05526	4.63012e-06	Hypothetical protein	Hypothetical, unclassified, unknown
PA1327		-1.05223	4.16186e-06	Probable protease	Putative enzymes
PA1173	napB	-1.05174	7.01592e-06	Cytochrome c-type protein NapB precursor	Energy metabolism
PA1860		-1.04414	6.01291e-06	Hypothetical protein	Putative enzymes
PA3688		-1.04323	5.27217e-06	Hypothetical protein	Hypothetical, unclassified, unknown
PA4652	cupE5	-1.03857	1.22541e-05	Fimbrial usher protein CupE5	Hypothetical, unclassified, unknown
PA1523	xdhB	-1.03856	6.41292e-06	Xanthine dehydrogenase	Nucleotide biosynthesis and metabolism
PA4311		-1.03497	4.86139e-06	Conserved hypothetical protein	Hypothetical, unclassified, unknown
PA4297	tadG	-1.034	1.03861e-05	TadG	Membrane proteins ; Motility & Attachment
PA4351	olsA	-1.03189	2.17024e-05	OlsA	Fatty acid and phospholipid metabolism
PA0743		-1.02502	7.06779e-06	Probable 3-hydroxyisobutyrate dehydrogenase	Carbon compound catabolism
PA0623		-1.02254	5.25313e-06	Probable bacteriophage protein	Related to phage, transposon, or plasmid
PA5210		-1.01778	6.09577e-06	Probable secretion pathway ATPase	Protein secretion/export apparatus
PA2920		-1.01461	8.01389e-06	Probable chemotaxis transducer	Adaptation, Protection ; Chemotaxis
PA2633		-1.01439	7.57766e-06	Hypothetical protein	Related to phage, transposon, or plasmid
PA3459		-1.00991	8.22696e-06	Probable glutamine amidotransferase	Amino acid biosynthesis and metabolism
PA5173	arcC	-1.00851	8.09139e-06	Carbamate kinase	Amino acid biosynthesis and metabolism
PA1041		-1.00722	7.84319e-06	Probable outer membrane protein precursor	Membrane proteins ; Transport of small molecules
PA2165		-1.00586	1.36123e-05	Probable glycogen synthase	Energy metabolism
PA5091	hutG	-1.0052	8.02449e-06	N-formylglutamate amidohydrolase	Amino acid biosynthesis and metabolism
PA4048		-1.00065	1.58921e-05	Hypothetical protein	Hypothetical, unclassified, unknown
PA2381		-1.00058	6.80821e-06	Hypothetical protein	Hypothetical, unclassified, unknown
PA2366	hsiC3	-1.00048	7.77716e-06	HsiC3	Hypothetical, unclassified, unknown
PA1717	pscD	1.10689	0.00229258	Type III export protein PscD	Protein secretion/export apparatus
PA2394	pvdN	1.11052	0.0131029	PvdN	Adaptation, Protection
PA1725	pscL	1.14814	0.00560389	Type III export protein PscL	Protein secretion/export apparatus
PA1724	pscK	1.15116	0.0124103	Type III export protein PscK	Protein secretion/export apparatus
PA0281	cysW	1.15342	0.00188233	Sulfate transport protein CysW	Membrane proteins ; Transport of small molecules
PA2202		1.15373	0.0120588	Probable amino acid permease	Membrane proteins ; Transport of small molecules
PA1716	pscC	1.15671	0.00107038	Type III secretion outer membrane protein PscC precursor	Protein secretion/export apparatus
PA1697		1.17512	0.00271095	ATP synthase in type III secretion system	Protein secretion/export apparatus
PA4179		1.18041	0.00180394	Probable porin	Membrane proteins ; Transport of small molecules
PA2749	endA	1.18062	0.00463604	DNA-specific endonuclease I	DNA replication, recombination, modification and repair
PA3585	glpM	1.1822	0.00521894	Membrane protein GlpM	Membrane proteins ; Transport of small molecules
PA2948	cobM	1.18506	0.00159878	Precorrin3- methylase	Biosynthesis of cofactors, prosthetic groups and carriers
PA1419		1.18563	0.000973488	Probable transporter	Membrane proteins ; Transport of small molecules
PA5368	pstC	1.18632	0.000237562	Membrane protein component of ABC phosphate transporter	Membrane proteins ; Transport of small molecules
PA0385		1.18928	0.00315808	Hypothetical protein	Hypothetical, unclassified, unknown
PA5367	pstA	1.1933	0.000219093	Membrane protein component of ABC phosphate transporter	Membrane proteins ; Transport of small molecules
PA2411		1.19425	0.00105326	Probable thioesterase	Adaptation, Protection ; Putative enzymes
PA3940		1.19642	0.00020663	Probable DNA binding protein	DNA replication, recombination, modification and repair
PA0331	ilvA1	1.1993	0.000238198	Threonine dehydratase, biosynthetic	Amino acid biosynthesis and metabolism
PA0897	aruG	1.20004	0.000188449	Subunit II of arginine N2-succinyltransferase = ornithine N2-succinyltransferase	Amino acid biosynthesis and metabolism
PA4763	recN	1.20272	0.000176893	DNA repair protein RecN	DNA replication, recombination, modification and repair
PA3643	lpxB	1.20307	0.000296269	Lipid A-disaccharide synthase	Cell wall / LPS / capsule
PA5463		1.20382	0.000469212	Hypothetical protein	Hypothetical, unclassified, unknown
PA5155		1.20525	0.00118459	Amino acid (lysine/arginine/ornithine/histidine/octopine) ABC transporter membrane protein	Membrane proteins ; Transport of small molecules
PA1031		1.20672	0.000150194	Conserved hypothetical protein	Hypothetical, unclassified, unknown
PA3082	gbt	1.20691	0.000285927	Glycine betaine transmethylase	Amino acid biosynthesis and metabolism
PA3607	potA	1.2071	0.00244862	Polyamine transport protein PotA	Transport of small molecules
PA0489		1.21125	0.00146996	Probable phosphoribosyl transferase	Putative enzymes
PA0921		1.21146	0.000723325	Hypothetical protein	Membrane proteins
PA0831	oruR	1.21293	0.000229574	Transcriptional regulator OruR	Transcriptional regulators
PA0423	pasP	1.21352	0.000150912	PasP	Secreted Factors (toxins, enzymes, alginate)
PA0494		1.21461	0.000344691	Probable acyl-CoA carboxylase subunit	Putative enzymes
PA3018		1.21681	0.000454187	Hypothetical protein	Hypothetical, unclassified, unknown
PA0800		1.217	0.00544818	Hypothetical protein	Membrane proteins
PA1359		1.2174	0.00124731	Probable transcriptional regulator	Transcriptional regulators
PA0372		1.21797	0.000192999	Probable zinc protease	Putative enzymes
PA5538	amiA	1.21926	0.000507938	N-acetylmuramoyl-L-alanine amidase	Cell wall / LPS / capsule
PA3764		1.22057	0.000283718	Conserved hypothetical protein	Hypothetical, unclassified, unknown
PA4271	rplL	1.22125	0.000120686	50S ribosomal protein L7 / L12	Translation, post-translational modification, degradation
PA1395		1.22452	0.00315896	Hypothetical protein	Hypothetical, unclassified, unknown
PA2522	czcC	1.22771	0.00169704	Outer membrane protein precursor CzcC	Membrane proteins ; Transport of small molecules
PA0775		1.22862	0.000370847	Conserved hypothetical protein	Hypothetical, unclassified, unknown
PA4069		1.2296	0.000160056	Hypothetical protein	Hypothetical, unclassified, unknown
PA1073	braD	1.23099	0.000153281	Branched-chain amino acid transport protein BraD	Membrane proteins ; Transport of small molecules
PA1240		1.23176	0.00092827	Probable enoyl-CoA hydratase/isomerase	Putative enzymes
PA3530	bfd	1.23194	0.00824563	Bacterioferritin-associated ferredoxin Bfd	Hypothetical, unclassified, unknown
PA4872		1.23368	0.000218337	Hypothetical protein	Hypothetical, unclassified, unknown
PA4579		1.23536	0.000145799	Hypothetical protein	Hypothetical, unclassified, unknown
PA0896	aruF	1.23622	0.000122023	Subunit I of arginine N2-succinyltransferase = ornithine N2-succinyltransferase	Amino acid biosynthesis and metabolism
PA0564		1.23688	0.000428911	Probable transcriptional regulator	Transcriptional regulators
PA2685	vgrG4	1.23692	0.000136208	VgrG4	Hypothetical, unclassified, unknown
PA4404		1.23706	0.000141318	Hypothetical protein	Hypothetical, unclassified, unknown
PA3130		1.23822	0.000340274	Hypothetical protein	Hypothetical, unclassified, unknown
PA1818	cadA	1.23823	8.73834e-05	Lysine decarboxylase	Amino acid biosynthesis and metabolism
PA0253	hudR	1.23996	0.00118988	HudR	Transcriptional regulators
PA4748	tpiA	1.24127	0.000113774	Triosephosphate isomerase	Central intermediary metabolism ; Energy metabolism
PA2137		1.24129	0.0055669	Hypothetical protein	Hypothetical, unclassified, unknown
PA0133	bauR	1.2416	0.000304085	BauR	Transcriptional regulators
PA3062	pelC	1.24309	0.00364291	PelC	Cell wall / LPS / capsule
PA2765		1.24347	0.000128125	Hypothetical protein	Hypothetical, unclassified, unknown
PA0243		1.24367	0.000273959	Probable transcriptional regulator	Transcriptional regulators
PA4801		1.24562	0.000780043	Hypothetical protein	Hypothetical, unclassified, unknown
PA0117		1.24574	0.000679905	Probable short chain dehydrogenase	Putative enzymes
PA4884		1.24648	0.00555065	Hypothetical protein	Hypothetical, unclassified, unknown
PA1790		1.24674	0.000315719	Hypothetical protein	Hypothetical, unclassified, unknown
PA1029		1.24751	0.00012444	Hypothetical protein	Hypothetical, unclassified, unknown
PA5049	rpmE	1.24793	8.43556e-05	50S ribosomal protein L31	Translation, post-translational modification, degradation
PA3238		1.24904	0.000214362	Hypothetical protein	Hypothetical, unclassified, unknown
PA1064		1.24943	0.000200856	Hypothetical protein	Hypothetical, unclassified, unknown
PA3838		1.2499	0.000149318	Probable ATP-binding component of ABC transporter	Transport of small molecules
PA2855		1.25145	0.000685967	Hypothetical protein	Hypothetical, unclassified, unknown
PA1101	fliF	1.252	9.31838e-05	Flagella M-ring outer membrane protein precursor	Cell wall / LPS / capsule ; Motility & Attachment
PA4370	icmP	1.2537	0.000108957	Insulin-cleaving metalloproteinase outer membrane protein precursor	Membrane proteins
PA3967		1.25571	0.000662381	Hypothetical protein	Hypothetical, unclassified, unknown
PA1675		1.25742	0.000304682	Conserved hypothetical protein	Hypothetical, unclassified, unknown
PA5391		1.25784	0.00453748	Hypothetical protein	Hypothetical, unclassified, unknown
PA4205	mexG	1.25801	0.000387055	Hypothetical protein	Membrane proteins
PA3897		1.25846	0.00155085	Hypothetical protein	Membrane proteins
PA3440.1		1.25921	0.000204008	Uncharacterized protein
PA3655	tsf	1.25983	8.61578e-05	Elongation factor Ts	Translation, post-translational modification, degradation
PA3080		1.26174	0.000104864	Hypothetical protein	Hypothetical, unclassified, unknown
PA3322		1.26648	0.000227118	Hypothetical protein	Hypothetical, unclassified, unknown
PA2440		1.27028	0.000519898	Hypothetical protein	Hypothetical, unclassified, unknown
PA4292		1.27029	0.000132709	Probable phosphate transporter	Membrane proteins ; Transport of small molecules
PA4956	rhdA	1.27368	0.000120027	Thiosulfate:cyanide sulfurtransferase	Central intermediary metabolism
PA1467		1.27747	0.000114942	Hypothetical protein	Hypothetical, unclassified, unknown
PA3887	nhaP	1.27821	0.000129676	Na+/H+ antiporter NhaP	Membrane proteins ; Transport of small molecules
PA2775	tsi4	1.28225	0.000371057	Tsi4	Membrane proteins
PA3016		1.28271	0.00159393	Hypothetical protein	Hypothetical, unclassified, unknown
PA3387	rhlG	1.28338	0.00104458	Beta-ketoacyl reductase	Cell wall / LPS / capsule ; Fatty acid and phospholipid metabolism
PA5296	rep	1.28352	7.0762e-05	ATP-dependent DNA helicase Rep	DNA replication, recombination, modification and repair
PA2441		1.28377	0.000477859	Hypothetical protein	Hypothetical, unclassified, unknown
PA3555	arnD	1.28381	0.000425682	ArnD	Adaptation, Protection ; Antibiotic resistance and susceptibility ; Cell wall / LPS / capsule
PA3979		1.28588	0.00016404	Hypothetical protein	Hypothetical, unclassified, unknown
PA4730	panC	1.28608	7.62358e-05	Pantoate--beta-alanine ligase	Biosynthesis of cofactors, prosthetic groups and carriers
PA3670		1.28832	5.4975e-05	Hypothetical protein	Hypothetical, unclassified, unknown
PA0129	bauD	1.2884	0.000248891	Amino acid permease	Transport of small molecules
PA5130		1.28844	0.000122565	Conserved hypothetical protein	Hypothetical, unclassified, unknown
PA1100	fliE	1.28859	7.20304e-05	Flagellar hook-basal body complex protein FliE	Cell wall / LPS / capsule ; Motility & Attachment
PA3893		1.29058	0.000126266	Conserved hypothetical protein	Membrane proteins
PA0419		1.29201	0.000112742	Conserved hypothetical protein	Hypothetical, unclassified, unknown
PA4100		1.29265	5.27011e-05	Probable dehydrogenase	Central intermediary metabolism
PA2528	muxA	1.29502	8.52473e-05	MuxA	Transport of small molecules
PA5440		1.29541	7.35782e-05	Probable peptidase	Translation, post-translational modification, degradation ; Putative enzymes
PA1507		1.30037	0.000118872	Probable transporter	Membrane proteins ; Transport of small molecules
PA0167		1.30063	0.000192813	Probable transcriptional regulator	Transcriptional regulators
PA0025	aroE	1.30305	7.02481e-05	Shikimate dehydrogenase	Amino acid biosynthesis and metabolism
PA1183	dctA	1.30309	5.70315e-05		Transport of small molecules
PA2660		1.30736	9.5169e-05	Hypothetical protein	Hypothetical, unclassified, unknown
PA0766	mucD	1.31225	3.22272e-05	Serine protease MucD precursor	Putative enzymes ; Cell wall / LPS / capsule ; Secreted Factors (toxins, enzymes, alginate)
PA1007		1.31279	7.87458e-05	Conserved hypothetical protein	Membrane proteins
PA3757	nagR	1.31753	0.0047701	Transcriptional regulator of N-Acetylglucosamine catabolism operon	Transcriptional regulators
PA3562	fruI	1.31773	4.73877e-05	Phosphotransferase system transporter enzyme I, FruI	Central intermediary metabolism ; Transport of small molecules
PA0562		1.31864	0.00013262	Probable hydrolase	Putative enzymes
PA3719	armR	1.31918	0.0073276	Antirepressor for MexR, ArmR	Antibiotic resistance and susceptibility
PA0142		1.31937	6.02584e-05	Hypothetical protein	Putative enzymes
PA4825	mgtA	1.31976	5.39931e-05	Mg(2+) transport ATPase, P-type 2	Transport of small molecules
PA4817		1.32363	0.00154043	Hypothetical protein	Hypothetical, unclassified, unknown
PA0046		1.32538	0.000324067	Hypothetical protein	Hypothetical, unclassified, unknown
PA3821	secD	1.32575	2.97374e-05	Secretion protein SecD	Membrane proteins ; Protein secretion/export apparatus
PA3235		1.32658	2.93811e-05	Conserved hypothetical protein	Membrane proteins
PA3552	arnB	1.32894	0.00018329	ArnB	Cell wall / LPS / capsule ; Antibiotic resistance and susceptibility ; Adaptation, Protection
PA1791		1.33033	0.000150346	Hypothetical protein	Hypothetical, unclassified, unknown
PA4636		1.33062	4.69221e-05	Hypothetical protein	Hypothetical, unclassified, unknown
PA2766		1.33124	7.63213e-05	Probable transcriptional regulator	Transcriptional regulators
PA5366	pstB	1.33351	4.6135e-05	ATP-binding component of ABC phosphate transporter	Membrane proteins ; Transport of small molecules
PA0340		1.33354	0.000220387	Conserved hypothetical protein	Membrane proteins
PA5183		1.33371	0.000895411	Hypothetical protein	Membrane proteins
PA3365		1.33685	2.15189e-05	Probable chaperone	Chaperones & heat shock proteins
PA2557		1.33736	2.22349e-05	Probable AMP-binding enzyme	Fatty acid and phospholipid metabolism
PA0517	nirC	1.33915	9.72214e-05	Probable c-type cytochrome precursor	Biosynthesis of cofactors, prosthetic groups and carriers ; Energy metabolism
PA4043	ispA	1.34468	4.95568e-05	Geranyltranstransferase	Biosynthesis of cofactors, prosthetic groups and carriers
PA0923	dinB	1.34473	3.76927e-05	DNA Polymerase IV, DinB	Adaptation, Protection ; DNA replication, recombination, modification and repair
PA4566	obg	1.34748	1.83833e-05	GtP-binding protein Obg	Adaptation, Protection
PA5286		1.35038	5.73642e-05	Conserved hypothetical protein	Hypothetical, unclassified, unknown
PA0895	aruC	1.35203	1.78181e-05	N2-Succinylornithine 5-aminotransferase (SOAT) = N2-acetylornithine 5-aminotransferase (ACOAT)	Amino acid biosynthesis and metabolism
PA4515		1.35264	0.000415138	Conserved hypothetical protein	Hypothetical, unclassified, unknown
PA3008		1.35507	2.46189e-05	Hypothetical protein	Hypothetical, unclassified, unknown
PA2793		1.35697	3.87134e-05	Hypothetical protein	Hypothetical, unclassified, unknown
PA3395	nosY	1.36283	0.000527045	NosY protein	Membrane proteins ; Energy metabolism
PA5351	rubA1	1.36498	0.000921	Rubredoxin 1	Carbon compound catabolism
PA3364	amiC	1.3672	1.17194e-05	Aliphatic amidase expression-regulating protein	Transcriptional regulators
PA4773	speD2	1.36845	0.00117372	SpeD2	Hypothetical, unclassified, unknown
PA0254	hudA	1.37011	3.55109e-05	HudA	Hypothetical, unclassified, unknown
PA1006		1.37314	7.25245e-05	Protein PA1006	Hypothetical, unclassified, unknown
PA3360		1.37718	0.000306715	Probable secretion protein	Secreted Factors (toxins, enzymes, alginate)
PA3892		1.3784	0.000507719	Conserved hypothetical protein	Hypothetical, unclassified, unknown
PA5139		1.38081	8.70012e-05	Hypothetical protein	Hypothetical, unclassified, unknown
PA3732		1.38096	1.30427e-05	Uncharacterized protein	Hypothetical, unclassified, unknown
PA4520		1.3842	9.99943e-06	Probable chemotaxis transducer	Adaptation, Protection ; Chemotaxis
PA0162	opdC	1.3851	6.84488e-05	Histidine porin OpdC	Membrane proteins ; Transport of small molecules
PA0232	pcaC	1.38866	4.39312e-05	Gamma-carboxymuconolactone decarboxylase	Carbon compound catabolism
PA4513		1.39667	2.38621e-05	Probable oxidoreductase	Putative enzymes
PA1771	estX	1.4048	3.60869e-05	EstX	Putative enzymes
PA5509		1.40535	0.000224839	Hypothetical protein	Hypothetical, unclassified, unknown
PA3984	lnt	1.40574	1.13889e-05	Apolipoprotein N-acyltransferase	Cell wall / LPS / capsule ; Translation, post-translational modification, degradation
PA0013		1.40802	0.000165858	Conserved hypothetical protein	Membrane proteins
PA4371		1.4124	2.14364e-05	Hypothetical protein	Hypothetical, unclassified, unknown
PA0341	lgt	1.41245	1.44377e-05	Prolipoprotein diacylglyceryl transferase	Translation, post-translational modification, degradation ; Fatty acid and phospholipid metabolism
PA2667	mvaU	1.4133	1.29851e-05	MvaU	Hypothetical, unclassified, unknown
PA5550	glmR	1.41535	7.00338e-05	GlmR transcriptional regulator	Transcriptional regulators
PA4731	panD	1.41584	4.92909e-05	Aspartate 1-decarboxylase precursor	Amino acid biosynthesis and metabolism ; Biosynthesis of cofactors, prosthetic groups and carriers
PA3815	iscR	1.41779	1.32049e-05	IscR	Hypothetical, unclassified, unknown
PA1260	lhpP	1.4182	0.000365123	AbC transporter periplasmic-binding protein, LhpP	Transport of small molecules
PA1271		1.41821	1.1133e-05	Probable tonB-dependent receptor	Transport of small molecules
PA2395	pvdO	1.41867	0.00101976	PvdO	Adaptation, Protection
PA5369	pstS	1.41965	6.10053e-06	Phosphate ABC transporter, periplasmic phosphate-binding protein, PstS	Transport of small molecules
PA0229	pcaT	1.42436	1.46697e-05	Dicarboxylic acid transporter PcaT	Membrane proteins ; Transport of small molecules
PA3742	rplS	1.42538	4.72431e-06	50S ribosomal protein L19	Translation, post-translational modification, degradation
PA1715	pscB	1.42602	0.00079907	Type III export apparatus protein	Protein secretion/export apparatus
PA3129		1.4267	1.18008e-05	Conserved hypothetical protein	Hypothetical, unclassified, unknown
PA1559		1.42919	9.70069e-05	Hypothetical protein	Hypothetical, unclassified, unknown
PA2693		1.43909	0.000469718	Conserved hypothetical protein	Hypothetical, unclassified, unknown
PA0913	mgtE	1.4402	4.71222e-06	MgtE	Transport of small molecules
PA0024	hemF	1.44415	8.62247e-06	Coproporphyrinogen III oxidase, aerobic	Biosynthesis of cofactors, prosthetic groups and carriers
PA4317		1.44625	8.24138e-06	Hypothetical protein	Membrane proteins
PA3194	edd	1.45306	5.30988e-06	Phosphogluconate dehydratase	Energy metabolism ; Carbon compound catabolism
PA4336		1.4536	3.47407e-06	Conserved hypothetical protein	Hypothetical, unclassified, unknown
PA3397	fprA	1.45362	4.39045e-06	FprA	Biosynthesis of cofactors, prosthetic groups and carriers ; Energy metabolism
PA5235	glpT	1.45407	6.06194e-06	Glycerol3--phosphate transporter	Membrane proteins ; Transport of small molecules
PA2559.1	srfA	1.45555	0.000140984	SrfA
PA1721	pscH	1.45668	0.000678306	Type III export protein PscH	Protein secretion/export apparatus
PA0283	sbp	1.4637	2.75953e-05	Sulfate-binding protein precursor	Transport of small molecules
PA4840		1.46534	3.08398e-05	Conserved hypothetical protein	Hypothetical, unclassified, unknown
PA2252		1.46575	1.58008e-05	Probable AGCS sodium/alanine/glycine symporter	Transport of small molecules
PA0922		1.47053	6.0069e-06	Hypothetical protein	Hypothetical, unclassified, unknown
PA3794		1.47729	2.83483e-05	Hypothetical protein	Membrane proteins
PA0240		1.47748	4.56619e-05	Probable porin	Membrane proteins ; Transport of small molecules
PA0380		1.48397	1.92163e-05	Conserved hypothetical protein	Hypothetical, unclassified, unknown
PA2285		1.48564	0.000242669	Hypothetical protein	Hypothetical, unclassified, unknown
PA4072		1.48872	3.73665e-06	Probable amino acid permease	Transport of small molecules
PA3363	amiR	1.49435	1.44763e-06	Aliphatic amidase regulator	Carbon compound catabolism ; Transcriptional regulators
PA3007	lexA	1.49477	2.02941e-06	Repressor protein LexA	Adaptation, Protection ; Translation, post-translational modification, degradation
PA2259	ptxS	1.49759	2.5405e-06	Transcriptional regulator PtxS	Secreted Factors (toxins, enzymes, alginate) ; Transcriptional regulators
PA3186	oprB	1.49795	2.29448e-06	Glucose/carbohydrate outer membrane porin OprB precursor	Transport of small molecules
PA5468		1.4993	8.26419e-06	Probable citrate transporter	Transport of small molecules
PA4042	xseB	1.5012	2.01598e-05	Exodeoxyribonuclease VII small subunit	DNA replication, recombination, modification and repair
PA2509	catB	1.50417	3.7651e-05	Muconate cycloisomerase I	Carbon compound catabolism
PA4724		1.51482	4.89658e-06	Probable aminoacyl-transfer RNA synthetase (class I)	Putative enzymes
PA5437		1.51498	8.65276e-06	Probable transcriptional regulator	Transcriptional regulators
PA4568	rplU	1.51905	1.01965e-06	50S ribosomal protein L21	Translation, post-translational modification, degradation
PA0045		1.51934	1.50498e-05	Hypothetical protein	Hypothetical, unclassified, unknown
PA5153		1.52551	9.4455e-07	Amino acid (lysine/arginine/ornithine/histidine/octopine) ABC transporter periplasmic binding protein	Transport of small molecules
PA2286		1.53013	6.89993e-06	Hypothetical protein	Membrane proteins
PA1317	cyoA	1.53032	9.14418e-05	Cytochrome o ubiquinol oxidase subunit II	Energy metabolism
PA3177		1.53226	1.84144e-06	Hypothetical protein	Hypothetical, unclassified, unknown
PA3743	trmD	1.5325	7.60512e-07	tRNA (guanine-N1)-methyltransferase	Transcription, RNA processing and degradation
PA4070		1.53395	1.29355e-06	Probable transcriptional regulator	Transcriptional regulators
PA2772		1.53436	6.84379e-05	Hypothetical protein	Hypothetical, unclassified, unknown
PA1301		1.53469	1.37144e-05	Probable transmembrane sensor	Membrane proteins ; Transcriptional regulators
PA4480	mreC	1.53753	1.78792e-06	Rod shape-determining protein MreC	Cell wall / LPS / capsule ; Cell division
PA5152		1.53846	1.2817e-06	Probable ATP-binding component of ABC transporter	Transport of small molecules
PA1435		1.53872	6.46407e-06	Probable Resistance-Nodulation-Cell Division (RND) efflux membrane fusion protein precursor	Transport of small molecules
PA3579		1.53942	2.1041e-06	Probable carbohydrate kinase	Putative enzymes
PA3656	rpsB	1.54289	7.30849e-07	30S ribosomal protein S2	Translation, post-translational modification, degradation
PA0464	creC	1.54311	2.52734e-06	Two-component sensor CreC	Two-component regulatory systems
PA2056		1.54348	1.46523e-05	Probable transcriptional regulator	Transcriptional regulators
PA0654	speD	1.54372	1.97746e-06	S-adenosylmethionine decarboxylase proenzyme	Central intermediary metabolism
PA0435		1.54416	2.42784e-06	Hypothetical protein	Hypothetical, unclassified, unknown
PA3876	narK2	1.5449	2.60753e-06	Nitrite extrusion protein 2	Membrane proteins ; Transport of small molecules
PA2761		1.54606	0.000510378	Hypothetical protein	Membrane proteins
PA4816		1.54642	1.5505e-06	Hypothetical protein	Hypothetical, unclassified, unknown
PA3582	glpK	1.54704	7.46816e-07	Glycerol kinase	Central intermediary metabolism
PA2393		1.55371	8.06674e-05	Putative dipeptidase	Central intermediary metabolism
PA3817		1.5553	1.17952e-06	Probable methyltransferase	Putative enzymes
PA4272	rplJ	1.55556	4.84133e-07	50S ribosomal protein L10	Translation, post-translational modification, degradation
PA3837		1.55612	1.58652e-06	Probable permease of ABC transporter	Membrane proteins ; Transport of small molecules
PA0165		1.5593	4.0987e-05	Hypothetical protein	Hypothetical, unclassified, unknown
PA4567	rpmA	1.56018	4.56314e-07	50S ribosomal protein L27	Translation, post-translational modification, degradation
PA4335		1.57501	3.5475e-07	Hypothetical protein	Hypothetical, unclassified, unknown
PA2555		1.57803	2.97195e-07	Probable AMP-binding enzyme	Putative enzymes
PA0358		1.57911	9.89268e-06	Hypothetical protein	Hypothetical, unclassified, unknown
PA5445		1.58008	3.83517e-07	Probable coenzyme A transferase	Putative enzymes
PA2906		1.58406	8.11906e-07	Probable oxidoreductase	Putative enzymes
PA4670	prs	1.58868	3.00492e-07	Ribose-phosphate pyrophosphokinase	Carbon compound catabolism ; Nucleotide biosynthesis and metabolism
PA1420		1.59049	8.06674e-05	Hypothetical protein	Hypothetical, unclassified, unknown
PA4501	opdD	1.59383	6.11447e-07	Glycine-glutamate dipeptide porin OpdP	Transport of small molecules ; Membrane proteins
PA4629		1.5982	6.52486e-06	Hypothetical protein	Hypothetical, unclassified, unknown
PA3394	nosF	1.59834	3.37671e-05	NosF protein	Energy metabolism ; Transport of small molecules
PA5465		1.59949	8.70729e-07	Hypothetical protein	Hypothetical, unclassified, unknown
PA2204		1.59988	1.92015e-06	Probable binding protein component of ABC transporter	Transport of small molecules
PA1044		1.60003	4.71344e-05	Hypothetical protein	Membrane proteins
PA3391	nosR	1.60109	1.18649e-06	Regulatory protein NosR	Membrane proteins ; Energy metabolism
PA0522		1.61502	0.000994924	Hypothetical protein	Hypothetical, unclassified, unknown
PA3181		1.61594	4.59116e-07	2-keto3--deoxy-6-phosphogluconate aldolase	Central intermediary metabolism ; Carbon compound catabolism
PA2757		1.61835	0.000107929	Hypothetical protein	Membrane proteins
PA1713	exsA	1.61845	1.21584e-06	Transcriptional regulator ExsA	Protein secretion/export apparatus ; Transcriptional regulators
PA1297		1.61889	1.22322e-06	Probable metal transporter	Membrane proteins ; Transport of small molecules
PA0082	tssA1	1.62183	4.88574e-07	TssA1	Hypothetical, unclassified, unknown
PA1098	fleS	1.63084	1.64834e-07	Two-component sensor	Two-component regulatory systems
PA3410	hasI	1.63326	0.000614409	HasI	Transcriptional regulators
PA3282		1.63473	1.6021e-05	Hypothetical protein	Hypothetical, unclassified, unknown
PA4934	rpsR	1.64638	6.83109e-08	30S ribosomal protein S18	Translation, post-translational modification, degradation
PA5217		1.64645	2.05463e-07	Probable binding protein component of ABC iron transporter	Transport of small molecules
PA3671		1.64786	9.60662e-07	Probable permease of ABC transporter	Membrane proteins ; Transport of small molecules
PA2452		1.65313	7.589e-06	Hypothetical protein	Hypothetical, unclassified, unknown
PA0874		1.6543	3.93662e-05	Hypothetical protein	Hypothetical, unclassified, unknown
PA4918	pcnA	1.65676	6.01574e-08	Nicotinamidase, PcnA	Hypothetical, unclassified, unknown
PA2283		1.66104	1.78482e-06	Hypothetical protein	Hypothetical, unclassified, unknown
PA0519	nirS	1.66294	1.13601e-07	Nitrite reductase precursor	Energy metabolism
PA0518	nirM	1.66654	2.27484e-07	Cytochrome c-551 precursor	Biosynthesis of cofactors, prosthetic groups and carriers ; Energy metabolism
PA4935	rpsF	1.6669	4.75296e-08	30S ribosomal protein S6	Translation, post-translational modification, degradation
PA1169		1.66779	1.10931e-07	Probable lipoxygenase	Putative enzymes
PA2386	pvdA	1.66813	1.06898e-06	L-ornithine N5-oxygenase	Adaptation, Protection
PA0975		1.67087	2.2422e-06	Probable radical activating enzyme	Putative enzymes
PA3870	moaA1	1.67663	2.14391e-06	Molybdopterin biosynthetic protein A1	Biosynthesis of cofactors, prosthetic groups and carriers
PA0390	metX	1.67866	1.46184e-07	Homoserine O-acetyltransferase	Amino acid biosynthesis and metabolism
PA4774	speE2	1.68193	3.80582e-06	SpeE2	Hypothetical, unclassified, unknown
PA0712		1.68446	4.98487e-05	Hypothetical protein	Hypothetical, unclassified, unknown
PA0047		1.68643	9.00207e-07	Hypothetical protein	Hypothetical, unclassified, unknown
PA4669	ipk	1.68808	4.34477e-08	Isopentenyl monophosphate kinase	Biosynthesis of cofactors, prosthetic groups and carriers
PA4120		1.68843	5.60274e-07	Probable transcriptional regulator	Transcriptional regulators
PA2257	pvcD	1.69229	6.80939e-05	Paerucumarin biosynthesis protein PvcD	Secreted Factors (toxins, enzymes, alginate) ; Amino acid biosynthesis and metabolism
PA3672		1.69587	1.34713e-07	Probable ATP-binding component of ABC transporter	Transport of small molecules
PA1300		1.69612	4.9494e-06	EcF sigma factor	Transcriptional regulators
PA1882		1.69734	6.37031e-06	Probable transporter	Membrane proteins ; Transport of small molecules
PA3730		1.69933	1.4383e-07	Hypothetical protein	Membrane proteins
PA5154		1.70098	1.22958e-07	Probable permease of ABC transporter	Membrane proteins ; Transport of small molecules
PA1016		1.70366	9.33183e-08	Hypothetical protein	Hypothetical, unclassified, unknown
PA0282	cysT	1.70817	2.31138e-06	Sulfate transport protein CysT	Membrane proteins ; Transport of small molecules
PA4442	cysN	1.70944	3.44484e-08	ATP sulfurylase GTP-binding subunit/APS kinase	Central intermediary metabolism ; Amino acid biosynthesis and metabolism
PA0672	hemO	1.71406	6.66855e-06	Heme oxygenase	Biosynthesis of cofactors, prosthetic groups and carriers
PA5375	betT1	1.72206	1.82769e-07	BetT1	Membrane proteins ; Transport of small molecules
PA0755	opdH	1.72755	2.15035e-07	Cis-aconitate porin OpdH	Membrane proteins ; Transport of small molecules
PA3580		1.73408	3.41124e-07	Conserved hypothetical protein	Hypothetical, unclassified, unknown
PA0247	pobA	1.7344	1.35702e-07	P-hydroxybenzoate hydroxylase	Carbon compound catabolism
PA4932	rplI	1.74186	9.7963e-09	50S ribosomal protein L9	Translation, post-translational modification, degradation
PA1962	azoR2	1.74466	9.70586e-06	FmN-dependent NADH-azoreductase 2, AzoR2	Putative enzymes
PA5138		1.75293	3.59241e-08	Hypothetical protein	Hypothetical, unclassified, unknown
PA2280		1.75392	2.02414e-07	Oxidoreductase	Hypothetical, unclassified, unknown
PA2026		1.75605	6.52711e-08	Conserved hypothetical protein	Membrane proteins
PA4438		1.76058	2.58414e-08	Conserved hypothetical protein	Hypothetical, unclassified, unknown
PA3370		1.76063	5.15601e-08	Hypothetical protein	Membrane proteins
PA2117		1.76307	8.6395e-08	Hypothetical protein	Hypothetical, unclassified, unknown
PA2284		1.76441	3.84601e-06	Hypothetical protein	Hypothetical, unclassified, unknown
PA4137		1.77113	2.14899e-07	Probable porin	Transport of small molecules
PA0805		1.77589	4.52449e-09	Hypothetical protein	Hypothetical, unclassified, unknown
PA3873	narJ	1.77882	1.01824e-07	Respiratory nitrate reductase delta chain	Energy metabolism
PA4933		1.78568	3.97411e-09	Hypothetical protein	Membrane proteins
PA2561	ctpH	1.78841	1.33069e-08	CtpH	Adaptation, Protection ; Chemotaxis
PA3602		1.79043	4.40619e-09	Conserved hypothetical protein	Membrane proteins
PA3369		1.79255	1.37012e-08	Hypothetical protein	Membrane proteins
PA0492		1.7966	9.23595e-07	Conserved hypothetical protein	Hypothetical, unclassified, unknown
PA0433		1.81086	3.88667e-07	Hypothetical protein	Hypothetical, unclassified, unknown
PA0578		1.81539	9.92841e-09	Conserved hypothetical protein	Hypothetical, unclassified, unknown
PA2018	mexY	1.81752	5.80142e-09	Resistance-Nodulation-Cell Division (RND) multidrug efflux transporter MexY	Transport of small molecules ; Membrane proteins ; Antibiotic resistance and susceptibility
PA3874	narH	1.81839	6.07553e-09	Respiratory nitrate reductase beta chain	Energy metabolism
PA0284		1.81966	1.72648e-05	Hypothetical protein	Hypothetical, unclassified, unknown
PA2287		1.82688	1.73827e-07	Hypothetical protein	Hypothetical, unclassified, unknown
PA1394		1.82925	1.73593e-05	Hypothetical protein	Hypothetical, unclassified, unknown
PA2862	lipA	1.83126	6.601e-09	Lactonizing lipase precursor	Carbon compound catabolism ; Secreted Factors (toxins, enzymes, alginate)
PA1452	flhA	1.83232	1.97322e-09	Flagellar biosynthesis protein FlhA	Chemotaxis ; Adaptation, Protection ; Motility & Attachment
PA0782	putA	1.83585	2.27459e-09	Proline dehydrogenase PutA	Amino acid biosynthesis and metabolism
PA3182	pgl	1.83804	1.06581e-08	6-phosphogluconolactonase	Central intermediary metabolism
PA2279	arsC	1.84213	9.70712e-08	ArsC protein	Adaptation, Protection ; Transport of small molecules
PA0729		1.84496	1.53069e-09	Hypothetical protein	Hypothetical, unclassified, unknown
PA3894		1.85191	2.55852e-08	Probable outer membrane protein precursor	Membrane proteins
PA3871		1.85294	3.09425e-08	Probable peptidyl-prolyl cis-trans isomerase, PpiC-type	Translation, post-translational modification, degradation ; Chaperones & heat shock proteins
PA0434		1.88829	4.85813e-09	Hypothetical protein	Membrane proteins
PA0947		1.893	2.58553e-09	Conserved hypothetical protein	Hypothetical, unclassified, unknown
PA4093		1.91495	6.14734e-07	Hypothetical protein	Hypothetical, unclassified, unknown
PA5508	pauA7	1.92286	5.09052e-09	Glutamylpolyamine synthetase homologue	Putative enzymes
PA3393	nosD	1.92563	5.48184e-08	NosD protein	Energy metabolism
PA1299		1.92589	1.11019e-08	Conserved hypothetical protein	Hypothetical, unclassified, unknown
PA3583	glpR	1.9286	7.71084e-09	Glycerol3--phosphate regulon repressor	Transcriptional regulators
PA0931	pirA	1.92985	5.3522e-09	Ferric enterobactin receptor PirA	Transport of small molecules
PA2860		1.93307	1.45349e-09	Hypothetical protein	Hypothetical, unclassified, unknown
PA3872	narI	1.95208	1.23141e-08	Respiratory nitrate reductase gamma chain	Energy metabolism
PA4675	chtA	1.96113	2.87423e-10	ChtA	Transport of small molecules
PA2118	ada	1.96156	6.01465e-10		Transcriptional regulators ; DNA replication, recombination, modification and repair
PA0783	putP	1.96571	1.65433e-10	Sodium/proline symporter PutP	Membrane proteins ; Transport of small molecules
PA4500	dppA3	1.97698	1.48324e-10	Probable binding protein component of ABC transporter	Transport of small molecules
PA2508	catC	1.98201	2.23884e-06	Muconolactone delta-isomerase	Carbon compound catabolism
PA1051		1.98856	8.83127e-10	Probable transporter	Membrane proteins ; Transport of small molecules
PA0521		1.9952	5.17203e-08	Probable cytochrome c oxidase subunit	Energy metabolism
PA4574		2.00277	4.46023e-09	Conserved hypothetical protein	Hypothetical, unclassified, unknown
PA0613		2.00701	1.48364e-10	Hypothetical protein	Hypothetical, unclassified, unknown
PA4154		2.03177	6.22615e-10	Conserved hypothetical protein	Hypothetical, unclassified, unknown
PA2382	lldA	2.05229	1.01508e-10	L-lactate dehydrogenase	Energy metabolism
PA4625	cdrA	2.08675	3.89338e-12	Cyclic diguanylate-regulated TPS partner A, CdrA	Hypothetical, unclassified, unknown
PA3183	zwf	2.09702	9.13268e-12	Glucose-6-phosphate 1-dehydrogenase	Energy metabolism ; Carbon compound catabolism
PA3187		2.09725	2.44096e-11	Probable ATP-binding component of ABC transporter	Transport of small molecules
PA2115		2.09741	4.1795e-10	Probable transcriptional regulator	Transcriptional regulators
PA2745		2.09873	1.55398e-11	Probable hydrolase	Putative enzymes
PA4128		2.1241	6.20994e-12	Conserved hypothetical protein	Putative enzymes
PA2507	catA	2.13224	4.11286e-11	Catechol 1,2-dioxygenase	Carbon compound catabolism
PA4443	cysD	2.14567	1.08832e-11	ATP sulfurylase small subunit	Central intermediary metabolism ; Amino acid biosynthesis and metabolism
PA3875	narG	2.15343	2.10229e-12	Respiratory nitrate reductase alpha chain	Energy metabolism
PA4140		2.15899	9.40083e-12	Hypothetical protein	Hypothetical, unclassified, unknown
PA3283		2.16203	9.64664e-11	Conserved hypothetical protein	Hypothetical, unclassified, unknown
PA4355	pyeM	2.17387	8.88737e-12	PyeM	Membrane proteins ; Transport of small molecules
PA5469		2.18031	3.71346e-09	Conserved hypothetical protein	Membrane proteins
PA0612	ptrB	2.18376	2.05489e-12	Repressor, PtrB	Transcriptional regulators
PA2260		2.20761	2.21345e-11	Hypothetical protein	Hypothetical, unclassified, unknown ; Carbon compound catabolism
PA2840		2.21533	4.58327e-13	Probable ATP-dependent RNA helicase	Transcription, RNA processing and degradation
PA3766		2.23283	3.29222e-12	Probable aromatic amino acid transporter	Transport of small molecules
PA3190		2.2587	1.94102e-13	Probable binding protein component of ABC sugar transporter	Transport of small molecules
PA5435		2.26776	5.29186e-14	Probable transcarboxylase subunit	Central intermediary metabolism
PA3371		2.27361	2.69627e-12	Hypothetical protein	Hypothetical, unclassified, unknown
PA0170		2.27775	8.85078e-12	Hypothetical protein	Hypothetical, unclassified, unknown
PA2288		2.28041	2.03235e-13	Hypothetical protein	Hypothetical, unclassified, unknown
PA3284		2.28737	5.946e-12	Hypothetical protein	Hypothetical, unclassified, unknown
PA3575		2.29844	1.38126e-13	Hypothetical protein	Membrane proteins
PA2262		2.30729	1.42428e-12	Probable 2-ketogluconate transporter	Membrane proteins ; Transport of small molecules
PA0169	siaD	2.30747	4.98522e-13	SiaD	Hypothetical, unclassified, unknown
PA4354		2.31159	1.82309e-12	Conserved hypothetical protein	Hypothetical, unclassified, unknown
PA1228		2.32567	3.20353e-09	Hypothetical protein	Hypothetical, unclassified, unknown
PA2263		2.33956	1.93583e-12	Probable 2-hydroxyacid dehydrogenase	Putative enzymes
PA2278	arsB	2.3494	4.69107e-12	ArsB protein	Membrane proteins ; Transport of small molecules
PA0241		2.35311	3.81153e-12	Probable major facilitator superfamily (MFS) transporter	Membrane proteins ; Transport of small molecules
PA0493		2.35918	1.31485e-07	Probable biotin-requiring enzyme	Putative enzymes
PA2256	pvcC	2.41976	1.59514e-11	Paerucumarin biosynthesis protein PvcC	Secreted Factors (toxins, enzymes, alginate) ; Amino acid biosynthesis and metabolism
PA0171		2.43104	4.64554e-13	Hypothetical protein	Motility & Attachment
PA1959	bacA	2.43877	8.1043e-14	Bacitracin resistance protein	Cell wall / LPS / capsule ; Adaptation, Protection ; Antibiotic resistance and susceptibility
PA3195	gapA	2.45193	4.14635e-15	Glyceraldehyde 3-phosphate dehydrogenase	Energy metabolism ; Carbon compound catabolism
PA2261		2.46597	4.40458e-14	Probable 2-ketogluconate kinase	Carbon compound catabolism
PA3741		2.47658	4.62333e-10	Hypothetical protein	Hypothetical, unclassified, unknown
PA5315	rpmG	2.49199	1.57679e-16	50S ribosomal protein L33	Translation, post-translational modification, degradation
PA5072		2.50264	2.39711e-16	Probable chemotaxis transducer	Adaptation, Protection ; Chemotaxis
PA5507		2.54048	4.49401e-13	Hypothetical protein	Hypothetical, unclassified, unknown
PA3205		2.54626	7.58635e-17	Hypothetical protein	Hypothetical, unclassified, unknown
PA2322	gntP	2.57776	6.35349e-15	GntP	Transport of small molecules
PA5084	dguA	2.62932	4.52594e-16	DguA	Putative enzymes
PA5506		2.6472	3.24424e-14	Hypothetical protein	Hypothetical, unclassified, unknown
PA4139		2.66188	6.02795e-18	Hypothetical protein	Hypothetical, unclassified, unknown
PA5316	rpmB	2.67234	7.63354e-19	50S ribosomal protein L28	Translation, post-translational modification, degradation
PA2111		2.67777	4.638e-19	Hypothetical protein	Hypothetical, unclassified, unknown
PA0277		2.69882	1.19138e-15	Conserved hypothetical protein	Hypothetical, unclassified, unknown
PA2277	arsR	2.72637	1.80432e-12	ArsR protein	Transcriptional regulators
PA0172	siaA	2.73306	3.91373e-18	SiaA	Hypothetical, unclassified, unknown
PA2323	gapN	2.73631	5.58118e-18	GapN	Carbon compound catabolism
PA5436		2.73701	1.25198e-19	Probable biotin carboxylase subunit of a transcarboxylase	Central intermediary metabolism
PA2410	fpvF	2.8176	8.83359e-19	FpvF	Hypothetical, unclassified, unknown
PA5082	dguC	2.84212	1.40482e-18	DguC	Transport of small molecules
PA3392	nosZ	2.85004	4.79902e-19	Nitrous-oxide reductase precursor	Energy metabolism
PA5083	dguB	2.86154	5.81474e-14	DguB	Hypothetical, unclassified, unknown
PA0228	pcaF	2.92647	1.62141e-20	Beta-ketoadipyl CoA thiolase PcaF	Fatty acid and phospholipid metabolism ; Carbon compound catabolism
PA2019	mexX	2.94242	1.53154e-19	Resistance-Nodulation-Cell Division (RND) multidrug efflux membrane fusion protein MexX precursor	Transport of small molecules ; Antibiotic resistance and susceptibility
PA2403	fpvG	2.97264	2.14021e-19	FpvG	Membrane proteins
PA2255	pvcB	2.98742	1.665e-16	Paerucumarin biosynthesis protein PvcB	Secreted Factors (toxins, enzymes, alginate) ; Amino acid biosynthesis and metabolism
PA2384		3.01034	2.68114e-14	Hypothetical protein	Hypothetical, unclassified, unknown
PA2664	fhp	3.0159	5.7351e-21	Flavohemoprotein	Energy metabolism
PA1168		3.02226	8.50587e-19	Hypothetical protein	Hypothetical, unclassified, unknown
PA2254	pvcA	3.02852	3.13823e-17	Paerucumarin biosynthesis protein PvcA	Secreted Factors (toxins, enzymes, alginate) ; Amino acid biosynthesis and metabolism
PA2409	fpvE	3.03825	2.2473e-18	FpvE	Membrane proteins ; Transport of small molecules
PA3189		3.07768	6.11852e-21	Probable permease of ABC sugar transporter	Transport of small molecules
PA2321	gntK	3.09134	6.49637e-18	GntK	Energy metabolism ; Carbon compound catabolism
PA4126		3.12371	2.07511e-22	Probable major facilitator superfamily (MFS) transporter	Membrane proteins ; Carbon compound catabolism ; Transport of small molecules
PA0525		3.13574	1.04587e-23	Probable dinitrification protein NorD	Energy metabolism
PA5530		3.13818	4.80874e-21		Membrane proteins ; Transport of small molecules
PA3188		3.14758	1.49747e-20	Probable permease of ABC sugar transporter	Transport of small molecules
PA2408	fpvD	3.15167	3.87672e-21	FpvD	Transport of small molecules
PA2515	xylL	3.19734	8.92107e-22	Cis-1,2-dihydroxycyclohexa3-,4-diene carboxylate dehydrogenase	Carbon compound catabolism
PA4514		3.23726	5.48213e-24	Probable outer membrane receptor for iron transport	Transport of small molecules
PA0227		3.31008	2.81239e-23	Probable CoA transferase, subunit B	Carbon compound catabolism
PA2406	fpvK	3.3512	4.09821e-22	FpvK	Hypothetical, unclassified, unknown
PA4826		3.35232	2.32163e-23	Hypothetical protein	Hypothetical, unclassified, unknown
PA2407	fpvC	3.35466	1.86564e-23	FpvC	Motility & Attachment
PA0242		3.38061	8.7446e-27	Hypothetical protein	Putative enzymes
PA5470		3.39612	2.22101e-27	Probable peptide chain release factor	Translation, post-translational modification, degradation
PA0226		3.48532	2.98724e-25	Probable CoA transferase, subunit A	Carbon compound catabolism
PA2405	fpvJ	3.52309	3.90036e-25	FpvJ	Hypothetical, unclassified, unknown
PA0245	aroQ2	3.64766	7.75509e-24	3-dehydroquinate dehydratase	Amino acid biosynthesis and metabolism
PA4635		3.67642	3.11146e-28	Conserved hypothetical protein	Hypothetical, unclassified, unknown
PA2404	fpvH	3.71991	4.64802e-27	FpvH	Membrane proteins
PA4121		3.77553	6.5253e-29	Conserved hypothetical protein	Hypothetical, unclassified, unknown
PA0244		3.77664	2.31855e-27	Hypothetical protein	Putative enzymes
PA5471	armZ	3.79674	2.43921e-34	ArmZ	Hypothetical, unclassified, unknown
PA4127	hpcG	3.8078	4.97299e-31	2-oxo-hept3--ene-1,7-dioate hydratase	Carbon compound catabolism
PA4122		3.8224	2.68842e-32	Conserved hypothetical protein	Hypothetical, unclassified, unknown
PA0153	pcaH	3.9398	3.29118e-30	Protocatechuate 3,4-dioxygenase, beta subunit	Carbon compound catabolism
PA4124	hpcB	3.95951	3.52015e-36	Homoprotocatechuate 2,3-dioxygenase	Carbon compound catabolism
PA5471.1		3.96354	4.10184e-27	PA5471 leader peptide
PA2398	fpvA	3.97416	9.1382e-35	Ferripyoverdine receptor	Transport of small molecules
PA4125	hpcD	4.0103	2.50608e-33	5-carboxymethyl-2-hydroxymuconate isomerase	Carbon compound catabolism
PA2516	xylZ	4.06307	1.09221e-32	Toluate 1,2-dioxygenase electron transfer component	Energy metabolism ; Carbon compound catabolism
PA2517	xylY	4.06803	2.17756e-30	Toluate 1,2-dioxygenase beta subunit	Carbon compound catabolism
PA0154	pcaG	4.06928	4.77441e-33	Protocatechuate 3,4-dioxygenase, alpha subunit	Carbon compound catabolism
PA4123	hpcC	4.20988	3.94696e-40	5-carboxy-2-hydroxymuconate semialdehyde dehydrogenase	Carbon compound catabolism
PA0524	norB	4.27672	2.2806e-39	Nitric-oxide reductase subunit B	Energy metabolism
PA2109		4.28318	5.60372e-35	Hypothetical protein	Hypothetical, unclassified, unknown
PA4092	hpaC	4.5195	1.42602e-43	4-hydroxyphenylacetate 3-monooxygenase small chain	Carbon compound catabolism
PA2518	xylX	4.54742	7.67756e-42	Toluate 1,2-dioxygenase alpha subunit	Carbon compound catabolism
PA4091	hpaA	4.6526	1.36184e-47	4-hydroxyphenylacetate 3-monooxygenase large chain	Carbon compound catabolism
PA0523	norC	4.76192	4.43324e-37	Nitric-oxide reductase subunit C	Energy metabolism
PA0048		4.91138	1.46702e-48	Probable transcriptional regulator	Transcriptional regulators
PA2114		5.57046	4.66028e-63	Probable major facilitator superfamily (MFS) transporter	Membrane proteins ; Transport of small molecules
PA2110		5.63378	1.57876e-61	Hypothetical protein	Hypothetical, unclassified, unknown
PA2116		5.83773	2.97256e-66	Conserved hypothetical protein	Hypothetical, unclassified, unknown
PA2112		5.86557	1.6555e-65	Conserved hypothetical protein	Hypothetical, unclassified, unknown
PA0049		5.92557	3.05398e-69	Hypothetical protein	Hypothetical, unclassified, unknown
PA2113	opdO	5.94208	1.24953e-67	Pyroglutamate porin OpdO	Transport of small molecules ; Membrane proteins
