# Supplementary material for: Traditional Chinese Medicine Tanreqing Inhibits Quorum Sensing Systems in Pseudomonas aeruginosa
Source: Front Microbiol. 2020 Dec 17;11:517462. doi: 10.3389/fmicb.2020.517462 (PMC7775676; doi:10.3389/fmicb.2020.517462)
Supplement: Supplementary Table 2 — TRQ-treated P. aeruginosa regulon in stationary growth phase. [file Table_2.xlsx]

## Sheet: TRQ-STA
PA no.a	Geneb	FCc	P value	Protein descriptiond	Functional classificatione
PA1900	phzB2	-5.58978	6.55103e-66	Probable phenazine biosynthesis protein	Secreted Factors (toxins, enzymes, alginate)
PA4211	phzB1	-4.87053	5.29252e-54	Probable phenazine biosynthesis protein	Secreted Factors (toxins, enzymes, alginate)
PA2300	chiC	-4.47919	1.19619e-51	Chitinase	Carbon compound catabolism
PA1902	phzD2	-3.96615	1.47674e-42	Phenazine biosynthesis protein PhzD	Secreted Factors (toxins, enzymes, alginate)
PA4213	phzD1	-3.96615	1.47674e-42	Phenazine biosynthesis protein PhzD	Secreted Factors (toxins, enzymes, alginate)
PA4078		-3.92847	2.72672e-41	Probable nonribosomal peptide synthetase	Adaptation, Protection
PA0852	cbpD	-3.84667	1.33054e-38	Chitin-binding protein CbpD precursor	Secreted Factors (toxins, enzymes, alginate)
PA3479	rhlA	-3.79547	9.25148e-38	Rhamnosyltransferase chain A	Secreted Factors (toxins, enzymes, alginate)
PA4217	phzS	-3.76845	7.74362e-39	Flavin-containing monooxygenase	Putative enzymes
PA0852.1		-3.76588	1.61058e-37	Uncharacterized protein
PA2069		-3.72813	1.55329e-39	Probable carbamoyl transferase	Putative enzymes
PA4212	phzC1	-3.71026	8.26886e-38	Phenazine biosynthesis protein PhzC	Secreted Factors (toxins, enzymes, alginate)
PA1901	phzC2	-3.69711	1.33696e-37	Phenazine biosynthesis protein PhzC	Secreted Factors (toxins, enzymes, alginate)
PA2570	lecA	-3.62371	2.10617e-33	LecA	Adaptation, Protection ; Motility & Attachment ; Cell wall / LPS / capsule
PA1903	phzE2	-3.50988	8.82102e-36	Phenazine biosynthesis protein PhzE	Secreted Factors (toxins, enzymes, alginate)
PA4214	phzE1	-3.50988	8.82102e-36	Phenazine biosynthesis protein PhzE	Secreted Factors (toxins, enzymes, alginate)
PA4205	mexG	-3.45348	9.29759e-34	Hypothetical protein	Membrane proteins
PA1904	phzF2	-3.45299	8.24995e-35	Probable phenazine biosynthesis protein	Secreted Factors (toxins, enzymes, alginate)
PA4215	phzF1	-3.45299	8.24995e-35	Probable phenazine biosynthesis protein	Secreted Factors (toxins, enzymes, alginate)
PA1871	lasA	-3.42351	3.12474e-32	LasA protease precursor	Secreted Factors (toxins, enzymes, alginate) ; Translation, post-translational modification, degradation
PA4216	phzG1	-3.36295	3.54501e-33	Probable pyridoxamine 5'-phosphate oxidase	Secreted Factors (toxins, enzymes, alginate)
PA1905	phzG2	-3.35818	3.86592e-33	Probable pyridoxamine 5'-phosphate oxidase	Secreted Factors (toxins, enzymes, alginate)
PA3478	rhlB	-3.28147	3.48082e-31	Rhamnosyltransferase chain B	Secreted Factors (toxins, enzymes, alginate)
PA3361	lecB	-3.273	3.31442e-29	Fucose-binding lectin PA-IIL	Motility & Attachment
PA2331		-3.2512	6.06558e-30	Hypothetical protein	Membrane proteins
PA4209	phzM	-3.16076	9.69179e-29	Probable phenazine-specific methyltransferase	Putative enzymes
PA1249	aprA	-3.11656	2.57005e-27	Alkaline metalloproteinase precursor	Secreted Factors (toxins, enzymes, alginate)
PA2195	hcnC	-3.0269	6.30041e-27	Hydrogen cyanide synthase HcnC	Central intermediary metabolism
PA2193	hcnA	-2.96569	2.29956e-25	Hydrogen cyanide synthase HcnA	Central intermediary metabolism
PA2194	hcnB	-2.88496	5.39418e-25	Hydrogen cyanide synthase HcnB	Central intermediary metabolism
PA1899	phzA2	-2.83023	7.96616e-24	Probable phenazine biosynthesis protein	Secreted Factors (toxins, enzymes, alginate)
PA0122	rahU	-2.70584	1.9042e-21	RahU	Hypothetical, unclassified, unknown
PA2330		-2.67426	6.17669e-23	Hypothetical protein	Hypothetical, unclassified, unknown
PA4141		-2.49785	3.76807e-19	Hypothetical protein	Hypothetical, unclassified, unknown
PA2381		-2.48805	7.38207e-19	Hypothetical protein	Hypothetical, unclassified, unknown
PA4133		-2.47859	1.01662e-18	Cytochrome c oxidase subunit (cbb3-type)	Energy metabolism
PA3520		-2.3661	5.58911e-14	Hypothetical protein	Hypothetical, unclassified, unknown
PA2062		-2.3551	9.43214e-19	Probable pyridoxal-phosphate dependent enzyme	Putative enzymes
PA2329		-2.34709	3.23919e-18	Probable ATP-binding component of ABC transporter	Transport of small molecules
PA4134		-2.33154	8.43646e-17	Hypothetical protein	Hypothetical, unclassified, unknown
PA4210	phzA1	-2.2389	3.15511e-16	Probable phenazine biosynthesis protein	Secreted Factors (toxins, enzymes, alginate)
PA1216		-2.23061	2.79594e-16	Hypothetical protein	Hypothetical, unclassified, unknown
PA2274		-2.22126	5.01797e-15	Hypothetical protein	Hypothetical, unclassified, unknown
PA1869	acp1	-2.20925	3.65151e-14	Acp1	Fatty acid and phospholipid metabolism
PA2204		-2.1476	1.26069e-14	Probable binding protein component of ABC transporter	Transport of small molecules
PA2302	ambE	-2.14756	2.91342e-15	AmbE	Putative enzymes
PA4129		-2.14456	8.55337e-15	Hypothetical protein	Hypothetical, unclassified, unknown
PA3450	lsfA	-2.12122	3.3317e-14	1-Cys peroxiredoxin LsfA	Adaptation, Protection
PA2304	ambC	-2.09758	1.84556e-14	AmbC	Hypothetical, unclassified, unknown
PA3930	cioA	-2.09683	2.76599e-14	Cyanide insensitive terminal oxidase	Energy metabolism
PA2303	ambD	-2.06252	3.81033e-14	AmbD	Hypothetical, unclassified, unknown
PA1837		-2.04936	4.88996e-14	Hypothetical protein	Hypothetical, unclassified, unknown
PA4206	mexH	-2.04426	2.88783e-15	Probable Resistance-Nodulation-Cell Division (RND) efflux membrane fusion protein precursor	Transport of small molecules
PA4130		-2.03451	1.49101e-13	Probable sulfite or nitrite reductase	Central intermediary metabolism
PA2305	ambB	-1.98899	1.25527e-13	AmbB	Putative enzymes
PA4132		-1.93551	1.11919e-12	Conserved hypothetical protein	Hypothetical, unclassified, unknown
PA4131		-1.91859	1.67904e-12	Probable iron-sulfur protein	Putative enzymes
PA2068		-1.90145	3.76721e-13	Probable major facilitator superfamily (MFS) transporter	Membrane proteins ; Transport of small molecules
PA0713		-1.88053	2.59591e-10	Hypothetical protein	Hypothetical, unclassified, unknown
PA4442	cysN	-1.87445	4.34044e-12	ATP sulfurylase GTP-binding subunit/APS kinase	Central intermediary metabolism ; Amino acid biosynthesis and metabolism
PA3929	cioB	-1.86081	1.0369e-11	Cyanide insensitive terminal oxidase	Energy metabolism
PA1245	aprX	-1.82257	8.24824e-12	AprX	Membrane proteins
PA0997	pqsB	-1.82162	3.08978e-11	PqsB	Biosynthesis of cofactors, prosthetic groups and carriers
PA2328		-1.79732	8.16001e-12	Hypothetical protein	Hypothetical, unclassified, unknown
PA3928		-1.79306	1.57168e-10	Hypothetical protein	Hypothetical, unclassified, unknown
PA5220		-1.78377	7.82433e-11	Hypothetical protein	Hypothetical, unclassified, unknown
PA2067		-1.7769	3.15756e-11	Probable hydrolase	Putative enzymes
PA1217		-1.752	2.1998e-11	Probable 2-isopropylmalate synthase	Amino acid biosynthesis and metabolism
PA2588		-1.74038	1.24207e-10	Probable transcriptional regulator	Transcriptional regulators
PA0284		-1.7294	2.53358e-07	Hypothetical protein	Hypothetical, unclassified, unknown
PA2566		-1.72625	5.3539e-10	Conserved hypothetical protein	Hypothetical, unclassified, unknown
PA3724	lasB	-1.70878	5.50227e-10	Elastase LasB	Secreted Factors (toxins, enzymes, alginate) ; Translation, post-translational modification, degradation
PA0998	pqsC	-1.68424	6.86168e-10	PqsC	Biosynthesis of cofactors, prosthetic groups and carriers
PA2031		-1.67567	1.80777e-09	Hypothetical protein	Hypothetical, unclassified, unknown
PA3734		-1.6333	8.93927e-10	Hypothetical protein	Hypothetical, unclassified, unknown
PA1247	aprE	-1.61296	9.23991e-10	Alkaline protease secretion protein AprE	Secreted Factors (toxins, enzymes, alginate) ; Protein secretion/export apparatus
PA0999	pqsD	-1.58502	4.44714e-09	3-oxoacyl-[acyl-carrier-protein] synthase III	Biosynthesis of cofactors, prosthetic groups and carriers
PA2066		-1.58302	6.02624e-09	Hypothetical protein	Hypothetical, unclassified, unknown
PA2030		-1.57272	1.0745e-08	Hypothetical protein	Hypothetical, unclassified, unknown
PA1784		-1.55669	3.78759e-08	Hypothetical protein	Hypothetical, unclassified, unknown
PA1000	pqsE	-1.46576	9.68513e-08	Quinolone signal response protein	Biosynthesis of cofactors, prosthetic groups and carriers
PA0977		-1.46415	0.000313242	Hypothetical protein	Hypothetical, unclassified, unknown
PA1838	cysI	-1.45808	4.17295e-08	Sulfite reductase	Central intermediary metabolism
PA2565		-1.45323	1.71687e-07	Hypothetical protein	Hypothetical, unclassified, unknown
PA2564		-1.45002	1.51787e-07	Hypothetical protein	Hypothetical, unclassified, unknown
PA1246	aprD	-1.43748	2.67172e-08	Alkaline protease secretion protein AprD	Secreted Factors (toxins, enzymes, alginate) ; Protein secretion/export apparatus
PA1218		-1.4275	4.92341e-08	Hypothetical protein	Hypothetical, unclassified, unknown
PA1250	aprI	-1.42275	2.17543e-07	Alkaline proteinase inhibitor AprI	Secreted Factors (toxins, enzymes, alginate)
PA1248	aprF	-1.40508	1.0138e-07	Alkaline protease secretion outer membrane protein AprF precursor	Secreted Factors (toxins, enzymes, alginate) ; Protein secretion/export apparatus
PA3869		-1.39082	0.000141163	Hypothetical protein	Hypothetical, unclassified, unknown
PA3884		-1.38014	5.76791e-07	Hypothetical protein	Hypothetical, unclassified, unknown
PA2459		-1.35973	4.09247e-06	Hypothetical protein	Hypothetical, unclassified, unknown
PA3813	iscU	-1.3579	1.01563e-06	Probable iron-binding protein IscU	Biosynthesis of cofactors, prosthetic groups and carriers
PA4079		-1.35097	6.04001e-07	NaD(P)H-dependent carbonyl reductase	Putative enzymes
PA4208	opmD	-1.34635	1.01314e-07	Probable outer membrane protein precursor	Membrane proteins ; Transport of small molecules
PA1927	metE	-1.34116	1.94746e-07	5-methyltetrahydropteroyltriglutamate-homocysteine S-methyltransferase	Amino acid biosynthesis and metabolism
PA1384	galE	-1.33613	8.40341e-06	UDP-glucose 4-epimerase	Nucleotide biosynthesis and metabolism ; Carbon compound catabolism ; Central intermediary metabolism
PA3814	iscS	-1.3224	1.16819e-06	L-cysteine desulfurase (pyridoxal phosphate-dependent)	Amino acid biosynthesis and metabolism ; Biosynthesis of cofactors, prosthetic groups and carriers
PA1215		-1.32071	2.51266e-07	Hypothetical protein	Hypothetical, unclassified, unknown
PA1152		-1.32046	0.000126304	Hypothetical protein	Hypothetical, unclassified, unknown
PA3791		-1.30745	2.62872e-06	Hypothetical protein	Hypothetical, unclassified, unknown ; Membrane proteins
PA0179		-1.29486	4.07319e-06	Probable two-component response regulator	Chemotaxis ; Adaptation, Protection ; Two-component regulatory systems
PA3812	iscA	-1.29381	3.73777e-06	Probable iron-binding protein IscA	Biosynthesis of cofactors, prosthetic groups and carriers
PA1317	cyoA	-1.28665	1.33063e-05	Cytochrome o ubiquinol oxidase subunit II	Energy metabolism
PA2036		-1.28473	3.88102e-05	Hypothetical protein	Hypothetical, unclassified, unknown
PA2327		-1.28275	1.06756e-06	Probable permease of ABC transporter	Membrane proteins ; Transport of small molecules
PA2293		-1.2795	1.11006e-06	Hypothetical protein	Hypothetical, unclassified, unknown
PA0269		-1.27311	4.70686e-06	Conserved hypothetical protein	Hypothetical, unclassified, unknown
PA0993	cupC2	-1.25611	9.10105e-05	Chaperone CupC2	Motility & Attachment ; Chaperones & heat shock proteins
PA0534	pauB1	-1.25403	1.79793e-06	FaD-dependent oxidoreductase	Putative enzymes
PA5088	tli5b3	-1.25163	3.40073e-05	Type VI secretion lipase immunity protein, Tli5b3	Hypothetical, unclassified, unknown
PA3441		-1.24982	4.72712e-05	Probable molybdopterin-binding protein	Transport of small molecules
PA2092		-1.24886	1.95041e-06	Probable major facilitator superfamily (MFS) transporter	Membrane proteins ; Transport of small molecules
PA1847	nfuA	-1.24608	7.07526e-06	NfuA	Hypothetical, unclassified, unknown
PA0270		-1.24365	9.3572e-06	Hypothetical protein	Hypothetical, unclassified, unknown
PA1381		-1.24353	2.43719e-05	Hypothetical protein	Hypothetical, unclassified, unknown
PA1393	cysC	-1.24212	0.00054312	Adenosine 5'-phosphosulfate (APS) kinase	Amino acid biosynthesis and metabolism ; Central intermediary metabolism ; Nucleotide biosynthesis and metabolism
PA2037		-1.23973	3.35163e-05	Hypothetical protein	Hypothetical, unclassified, unknown
PA2763		-1.23616	0.000125599	Hypothetical protein	Membrane proteins
PA4295	fppA	-1.23519	0.00579665	Flp prepilin peptidase A, FppA	Motility & Attachment
PA5058	phaC2	-1.23383	3.87961e-06	Poly(3-hydroxyalkanoic acid) synthase 2	Central intermediary metabolism
PA3209		-1.23322	1.16537e-05	Conserved hypothetical protein	Hypothetical, unclassified, unknown
PA1318	cyoB	-1.23314	2.01084e-05	Cytochrome o ubiquinol oxidase subunit I	Energy metabolism
PA0984		-1.2301	0.000143671	Colicin immunity protein	Membrane proteins ; Secreted Factors (toxins, enzymes, alginate)
PA0996	pqsA	-1.22747	5.32612e-06	PqsA	Biosynthesis of cofactors, prosthetic groups and carriers
PA2301		-1.22045	5.91492e-06	Hypothetical protein	Hypothetical, unclassified, unknown
PA0691	phdA	-1.21732	9.64213e-05	Prevent-host-death protein A	Hypothetical, unclassified, unknown
PA1320	cyoD	-1.21692	0.000543455	Cytochrome o ubiquinol oxidase subunit IV	Energy metabolism
PA3291	tli1	-1.21414	6.81578e-05	Tli1	Hypothetical, unclassified, unknown
PA4230	pchB	-1.21391	7.90368e-06	Salicylate biosynthesis protein PchB	Secreted Factors (toxins, enzymes, alginate) ; Transport of small molecules
PA1130	rhlC	-1.21354	9.79454e-06	Rhamnosyltransferase 2	Cell wall / LPS / capsule ; Adaptation, Protection
PA5460		-1.20152	0.000222261	Hypothetical protein	Hypothetical, unclassified, unknown
PA4062		-1.19131	3.03174e-05	Hypothetical protein	Hypothetical, unclassified, unknown
PA1431	rsaL	-1.18505	3.58413e-05	Regulatory protein RsaL	Secreted Factors (toxins, enzymes, alginate) ; Adaptation, Protection ; Transcriptional regulators
PA3931		-1.18243	0.00015686	Conserved hypothetical protein	Hypothetical, unclassified, unknown
PA3790	oprC	-1.17994	1.05441e-05	Putative copper transport outer membrane porin OprC precursor	Transport of small molecules
PA0497		-1.16672	0.000163747	Hypothetical protein	Hypothetical, unclassified, unknown
PA0980		-1.16556	0.000184431	Hypothetical protein	Hypothetical, unclassified, unknown
PA3292		-1.16551	6.55647e-05	Hypothetical protein	Hypothetical, unclassified, unknown
PA2829		-1.15903	0.000100663	Hypothetical protein	Hypothetical, unclassified, unknown
PA3022		-1.14107	3.00869e-05	Hypothetical protein	Hypothetical, unclassified, unknown
PA2094		-1.13916	1.81016e-05	Probable transmembrane sensor	Membrane proteins ; Transcriptional regulators
PA0819		-1.13261	0.00194529	Hypothetical protein	Hypothetical, unclassified, unknown
PA1386		-1.12981	0.000268949	Probable ATP-binding component of ABC transporter	Transport of small molecules
PA2678		-1.12868	0.00027678	Probable permease of ABC-2 transporter	Membrane proteins ; Transport of small molecules
PA1385		-1.12534	0.000174797	Probable glycosyl transferase	Cell wall / LPS / capsule
PA2461		-1.12521	0.000215991	Hypothetical protein	Hypothetical, unclassified, unknown
PA1001	phnA	-1.12422	2.07967e-05	Anthranilate synthase component I	Adaptation, Protection
PA1867	xphA	-1.12289	3.49384e-05	XphA	Protein secretion/export apparatus
PA0878		-1.1157	4.47556e-05	Hypothetical protein	Hypothetical, unclassified, unknown
PA2102		-1.11544	0.000726431	Hypothetical protein	Hypothetical, unclassified, unknown
PA2343	mtlY	-1.11529	2.73712e-05	Xylulose kinase	Carbon compound catabolism
PA5059		-1.11177	3.55673e-05	Probable transcriptional regulator	Transcriptional regulators
PA4443	cysD	-1.10976	6.24265e-05	ATP sulfurylase small subunit	Central intermediary metabolism ; Amino acid biosynthesis and metabolism
PA0979		-1.10698	0.00121431	Conserved hypothetical protein	Related to phage, transposon, or plasmid
PA2101		-1.10589	0.000466128	Conserved hypothetical protein	Membrane proteins
PA0271		-1.10292	9.94482e-05	Hypothetical protein	Hypothetical, unclassified, unknown
PA5087	tli5b2	-1.09959	0.000270244	Type VI secretion lipase immunity protein, Tli5b2	Hypothetical, unclassified, unknown
PA1002	phnB	-1.09946	4.80282e-05	Anthranilate synthase component II	Amino acid biosynthesis and metabolism ; Adaptation, Protection
PA0201		-1.09741	3.83568e-05	Hypothetical protein	Hypothetical, unclassified, unknown
PA0994	cupC3	-1.09642	0.000218948	Usher CupC3	Motility & Attachment
PA2495	oprN	-1.0946	5.12652e-05	Multidrug efflux outer membrane protein OprN precursor	Membrane proteins ; Antibiotic resistance and susceptibility ; Transport of small molecules
PA1214		-1.09242	2.02676e-05	Hypothetical protein	Hypothetical, unclassified, unknown
PA0708.1		-1.08159	0.00535098	Uncharacterized protein
PA3442		-1.08019	5.34463e-05	Probable ATP-binding component of ABC transporter	Transport of small molecules
PA0283	sbp	-1.07644	0.00015386	Sulfate-binding protein precursor	Transport of small molecules
PA2090		-1.0763	5.56397e-05	Hypothetical protein	Hypothetical, unclassified, unknown
PA4864	ureD	-1.07507	3.65335e-05	Urease accessory protein	Central intermediary metabolism
PA3558	arnF	-1.07425	7.08942e-05	ArnF	Membrane proteins ; Adaptation, Protection ; Cell wall / LPS / capsule
PA4089		-1.06177	6.83293e-05	Probable short-chain dehydrogenase	Putative enzymes
PA2916		-1.0608	0.000100828	Hypothetical protein	Membrane proteins
PA3431		-1.05201	9.45439e-05	Conserved hypothetical protein	Membrane proteins
PA3425		-1.04764	0.00013228	Hypothetical protein	Hypothetical, unclassified, unknown
PA3789		-1.04712	7.74553e-05	Hypothetical protein	Membrane proteins
PA2055		-1.04648	6.24228e-05	Probable major facilitator superfamily (MFS) transporter	Membrane proteins ; Antibiotic resistance and susceptibility ; Transport of small molecules
PA2786		-1.04455	0.000105112	Hypothetical protein	Hypothetical, unclassified, unknown
PA2325		-1.04204	0.00016945	Hypothetical protein	Putative enzymes
PA5116		-1.04132	5.03581e-05	Probable transcriptional regulator	Transcriptional regulators
PA0135		-1.03674	0.00177025	Hypothetical protein	Hypothetical, unclassified, unknown
PA1911	femR	-1.0366	8.19206e-05	Sigma factor regulator, FemR	Membrane proteins ; Transcriptional regulators
PA4207	mexI	-1.03471	3.43243e-05	Probable Resistance-Nodulation-Cell Division (RND) efflux transporter	Membrane proteins ; Transport of small molecules
PA2191	exoY	-1.03343	0.00030072	Adenylate cyclase ExoY	Secreted Factors (toxins, enzymes, alginate)
PA5144		-1.03284	0.000109559	Hypothetical protein	Hypothetical, unclassified, unknown
PA1695	pscP	-1.03276	0.000111573	Translocation protein in type III secretion	Protein secretion/export apparatus
PA2689	pfeE	-1.03132	0.000143726	Esterase, PfeE	Hypothetical, unclassified, unknown
PA1278	cobP	-1.0311	0.000156076	Cobinamide kinase	Biosynthesis of cofactors, prosthetic groups and carriers
PA2061	sppD	-1.0287	0.000110507	AbC transporter ATP-binding protein, SppD	Transport of small molecules
PA2314		-1.01983	0.00020717	Probable major facilitator superfamily (MFS) transporter	Membrane proteins ; Transport of small molecules
PA0177		-1.01809	0.000219117	Probable purine-binding chemotaxis protein	Adaptation, Protection ; Chemotaxis
PA1267	lhpB	-1.01704	0.000140326	D-hydroxyproline dehydrogenase beta-subunit, LphB	Hypothetical, unclassified, unknown
PA1891		-1.0155	0.000299003	Hypothetical protein	Membrane proteins
PA1219		-1.01463	0.000252471	Hypothetical protein	Hypothetical, unclassified, unknown
PA1237		-1.00746	7.23875e-05	Probable multidrug resistance efflux pump	Transport of small molecules ; Antibiotic resistance and susceptibility
PA2295		-1.00509	0.000220161	Probable permease of ABC transporter	Membrane proteins ; Transport of small molecules
PA2091		-1.00218	0.000182108	Hypothetical protein	Membrane proteins
PA3162	rpsA	1.00631	9.88986e-05	30S ribosomal protein S1	Translation, post-translational modification, degradation
PA5298		1.00669	7.61532e-05	Xanthine phosphoribosyltransferase	Nucleotide biosynthesis and metabolism
PA2545	xthA	1.00809	6.70784e-05	Exodeoxyribonuclease III	DNA replication, recombination, modification and repair
PA0110		1.00875	4.15623e-06	Hypothetical protein	Hypothetical, unclassified, unknown
PA3397	fprA	1.00905	7.50836e-05	FprA	Biosynthesis of cofactors, prosthetic groups and carriers ; Energy metabolism
PA4238	rpoA	1.00968	0.000102389	DNA-directed RNA polymerase alpha chain	Transcription, RNA processing and degradation
PA4267	rpsG	1.01301	9.13301e-05	30S ribosomal protein S7	Translation, post-translational modification, degradation
PA3363	amiR	1.01596	3.27666e-05	Aliphatic amidase regulator	Carbon compound catabolism ; Transcriptional regulators
PA0460		1.01652	4.75193e-05	Hypothetical protein	Hypothetical, unclassified, unknown
PA1074	braC	1.02038	6.63731e-05	Branched-chain amino acid transport protein BraC	Transport of small molecules
PA0300	spuD	1.02391	6.47809e-05	Polyamine transport protein	Transport of small molecules
PA1650		1.02535	1.24528e-05	Probable transporter	Membrane proteins ; Transport of small molecules
PA1750		1.02615	4.41469e-05	Phospho-2-dehydro3--deoxyheptonate aldolase	Amino acid biosynthesis and metabolism
PA0576	rpoD	1.03233	4.33373e-05	Sigma factor RpoD	Transcriptional regulators
PA4204	ppgL	1.03311	1.44439e-05	Periplasmic gluconolactonase, PpgL	Hypothetical, unclassified, unknown
PA1339	aatP	1.03459	3.24373e-05	AatP	Transport of small molecules
PA4723	dksA	1.03486	4.53762e-05	Suppressor protein DksA	Transcriptional regulators ; Adaptation, Protection ; DNA replication, recombination, modification and repair
PA1863	modA	1.03488	2.71157e-05	Molybdate-binding periplasmic protein precursor ModA	Transport of small molecules
PA4941	hflC	1.03561	4.58718e-05	Protease subunit HflC	Translation, post-translational modification, degradation ; Cell division
PA4751	ftsH	1.03748	4.42088e-05	Cell division protein FtsH	Cell division
PA4578		1.03858	6.37627e-05	Hypothetical protein	Hypothetical, unclassified, unknown
PA1544	anr	1.04035	5.22963e-05	Transcriptional regulator Anr	Transcriptional regulators
PA5323	argB	1.04727	3.30371e-05	Acetylglutamate kinase	Amino acid biosynthesis and metabolism
PA3820	secF	1.04794	2.53538e-05	Secretion protein SecF	Protein secretion/export apparatus
PA0789		1.04818	8.7088e-06	Probable amino acid permease	Membrane proteins ; Transport of small molecules
PA4566	obg	1.04942	2.55951e-05	GtP-binding protein Obg	Adaptation, Protection
PA4559	lspA	1.05082	6.26218e-05	Prolipoprotein signal peptidase	Protein secretion/export apparatus ; Translation, post-translational modification, degradation
PA4640	mqoB	1.05138	1.3352e-05	Malate:quinone oxidoreductase	Central intermediary metabolism ; Energy metabolism
PA1333		1.05177	2.83562e-05	Hypothetical protein	Hypothetical, unclassified, unknown
PA4745	nusA	1.05237	2.7519e-05	Nutilization substance protein A	Transcription, RNA processing and degradation
PA4420		1.05435	1.38513e-05	Conserved hypothetical protein	Hypothetical, unclassified, unknown
PA0141		1.05541	1.45019e-05	Conserved hypothetical protein	Hypothetical, unclassified, unknown
PA0459		1.05647	1.97925e-05	Probable ClpA/B protease ATP binding subunit	Translation, post-translational modification, degradation
PA4669	ipk	1.05892	6.85143e-06	Isopentenyl monophosphate kinase	Biosynthesis of cofactors, prosthetic groups and carriers
PA5369	pstS	1.05955	1.26842e-05	Phosphate ABC transporter, periplasmic phosphate-binding protein, PstS	Transport of small molecules
PA0506		1.06028	2.71362e-05	Probable acyl-CoA dehydrogenase	Putative enzymes
PA1617		1.06198	1.80038e-05	Probable AMP-binding enzyme	Putative enzymes
PA4496	dppA1	1.06559	2.30228e-05	Probable binding protein component of ABC transporter	Transport of small molecules
PA4251	rplE	1.06996	3.89182e-05	50S ribosomal protein L5	Translation, post-translational modification, degradation
PA5424		1.0722	2.66402e-05	Conserved hypothetical protein	Membrane proteins
PA5381		1.07257	7.655e-06	Hypothetical protein	Hypothetical, unclassified, unknown
PA1800	tig	1.07325	2.89476e-05	Trigger factor	Cell division ; Chaperones & heat shock proteins
PA4661	pagL	1.07393	3.34896e-05	Lipid A 3-O-deacylase	Hypothetical, unclassified, unknown
PA3634		1.07449	8.37959e-05	Conserved hypothetical protein	Hypothetical, unclassified, unknown
PA4733	acsB	1.07487	2.30574e-05	Acetyl-coenzyme A synthetase	Carbon compound catabolism ; Central intermediary metabolism
PA4421		1.07535	1.21677e-05	Conserved hypothetical protein	Hypothetical, unclassified, unknown
PA3158	wbpB	1.07745	8.39054e-06	UDP-2-acetamido-2-deoxy-d-glucuronic acid 3-dehydrogenase, WbpB	Putative enzymes ; Cell wall / LPS / capsule
PA1812	mltD	1.0842	8.74089e-06	Membrane-bound lytic murein transglycosylase D precursor	Amino acid biosynthesis and metabolism ; Cell wall / LPS / capsule
PA1988	pqqD	1.08721	2.87614e-05	Pyrroloquinoline quinone biosynthesis protein D	Biosynthesis of cofactors, prosthetic groups and carriers
PA5049	rpmE	1.08853	2.93994e-05	50S ribosomal protein L31	Translation, post-translational modification, degradation
PA4419	ftsL	1.08857	3.5779e-05	Cell division protein FtsL	Cell division
PA4240	rpsK	1.09093	3.00826e-05	30S ribosomal protein S11	Translation, post-translational modification, degradation
PA5337	rpoZ	1.0941	2.32274e-05	RnA polymerase omega subunit	Transcription, RNA processing and degradation
PA0943		1.09444	1.98415e-05	Hypothetical protein	Hypothetical, unclassified, unknown
PA5399	dgcB	1.09676	2.04496e-06	DgcB, Dimethylglycine catabolism	Amino acid biosynthesis and metabolism
PA4255	rpmC	1.09682	1.84229e-05	50S ribosomal protein L29	Translation, post-translational modification, degradation
PA0039		1.09843	2.86915e-05	Hypothetical protein	Hypothetical, unclassified, unknown
PA1805	ppiD	1.10264	1.05622e-05	Peptidyl-prolyl cis-trans isomerase D	Translation, post-translational modification, degradation ; Chaperones & heat shock proteins
PA1674	folE2	1.10366	1.56503e-05	GtP cyclohydrolase I precursor	Biosynthesis of cofactors, prosthetic groups and carriers
PA1179	phoP	1.10397	1.68964e-05	Two-component response regulator PhoP	Transcriptional regulators ; Two-component regulatory systems
PA4348		1.11012	5.78643e-06	Conserved hypothetical protein	Hypothetical, unclassified, unknown
PA4264	rpsJ	1.11022	2.15729e-05	30S ribosomal protein S10	Transcription, RNA processing and degradation ; Translation, post-translational modification, degradation
PA3744	rimM	1.11035	1.85035e-05	16S rRNA processing protein	Transcription, RNA processing and degradation
PA1178	oprH	1.11327	1.50717e-05	PhoP/Q and low Mg2+ inducible outer membrane protein H1 precursor	Membrane proteins ; Adaptation, Protection ; Transport of small molecules
PA4139		1.11568	1.36005e-05	Hypothetical protein	Hypothetical, unclassified, unknown
PA2172		1.11652	1.93747e-06	Hypothetical protein	Hypothetical, unclassified, unknown
PA4241	rpsM	1.11795	2.17601e-05	30S ribosomal protein S13	Translation, post-translational modification, degradation
PA3079		1.11987	2.06462e-06	Hypothetical protein	Membrane proteins
PA4252	rplX	1.12025	1.46627e-05	50S ribosomal protein L24	Translation, post-translational modification, degradation
PA4258	rplV	1.12238	1.59298e-05	50S ribosomal protein L22	Translation, post-translational modification, degradation
PA4449	hisG	1.1239	9.91032e-06	ATP-phosphoribosyltransferase	Amino acid biosynthesis and metabolism
PA2821		1.12454	4.89953e-06	Probable glutathione S-transferase	Central intermediary metabolism
PA3821	secD	1.13011	2.72518e-06	Secretion protein SecD	Membrane proteins ; Protein secretion/export apparatus
PA5130		1.13263	1.39806e-05	Conserved hypothetical protein	Hypothetical, unclassified, unknown
PA4031	ppa	1.13619	9.17641e-06	Inorganic pyrophosphatase	Central intermediary metabolism
PA5554	atpD	1.13721	1.26978e-05	ATP synthase beta chain	Energy metabolism
PA0871	phhB	1.13747	1.2321e-05	Pterin-4-alpha-carbinolamine dehydratase	Amino acid biosynthesis and metabolism
PA1746		1.13967	2.90436e-06	Hypothetical protein	Hypothetical, unclassified, unknown
PA3031		1.14004	1.10411e-05	Hypothetical protein	Hypothetical, unclassified, unknown
PA4259	rpsS	1.14094	1.27273e-05	30S ribosomal protein S19	Translation, post-translational modification, degradation
PA5558	atpF	1.14134	1.30962e-05	ATP synthase B chain	Energy metabolism
PA2622	cspD	1.14257	1.03501e-05	Cold-shock protein CspD	Transcriptional regulators ; Adaptation, Protection
PA4256	rplP	1.14305	9.35105e-06	50S ribosomal protein L16	Translation, post-translational modification, degradation
PA4942	hflK	1.14462	7.64333e-06	Protease subunit HflK	Translation, post-translational modification, degradation ; Cell division
PA5436		1.14501	1.42192e-06	Probable biotin carboxylase subunit of a transcarboxylase	Central intermediary metabolism
PA2114		1.14541	1.25961e-06	Probable major facilitator superfamily (MFS) transporter	Membrane proteins ; Transport of small molecules
PA4245	rpmD	1.15029	1.21592e-05	50S ribosomal protein L30	Translation, post-translational modification, degradation
PA3709		1.15086	8.84318e-07	Probable major facilitator superfamily (MFS) transporter	Membrane proteins ; Transport of small molecules
PA1673		1.15111	4.97996e-06	Hypothetical protein	Hypothetical, unclassified, unknown
PA0567		1.15417	2.03174e-05	Conserved hypothetical protein	Hypothetical, unclassified, unknown ; Membrane proteins
PA4639		1.15573	3.54194e-06	Hypothetical protein	Hypothetical, unclassified, unknown
PA5129	grxC	1.15785	1.63447e-05	GrxC	Energy metabolism ; Nucleotide biosynthesis and metabolism
PA4731	panD	1.15922	7.67894e-05	Aspartate 1-decarboxylase precursor	Amino acid biosynthesis and metabolism ; Biosynthesis of cofactors, prosthetic groups and carriers
PA4588	gdhA	1.17097	1.14634e-06	Glutamate dehydrogenase	Amino acid biosynthesis and metabolism
PA4625	cdrA	1.1726	4.91789e-07	Cyclic diguanylate-regulated TPS partner A, CdrA	Hypothetical, unclassified, unknown
PA5556	atpA	1.17468	6.03555e-06	ATP synthase alpha chain	Energy metabolism
PA4394		1.17766	1.19965e-06	Conserved hypothetical protein	Hypothetical, unclassified, unknown
PA3231		1.17856	3.59448e-05	Hypothetical protein	Membrane proteins
PA2249	bkdB	1.17864	4.56053e-06	Branched-chain alpha-keto acid dehydrogenase (lipoamide component)	Amino acid biosynthesis and metabolism
PA3572		1.18035	4.32746e-06	Hypothetical protein	Hypothetical, unclassified, unknown
PA2264		1.18103	3.00373e-06	Conserved hypothetical protein	Hypothetical, unclassified, unknown
PA4271	rplL	1.1814	5.64451e-06	50S ribosomal protein L7 / L12	Translation, post-translational modification, degradation
PA4239	rpsD	1.18262	5.58267e-06	30S ribosomal protein S4	Translation, post-translational modification, degradation
PA5137		1.18581	1.75307e-06	Hypothetical protein	Hypothetical, unclassified, unknown
PA5491		1.19149	2.69298e-06	Probable cytochrome	Energy metabolism
PA2384		1.1918	1.72867e-06	Hypothetical protein	Hypothetical, unclassified, unknown
PA4377		1.1958	5.45496e-06	Hypothetical protein	Hypothetical, unclassified, unknown
PA3635	eno	1.1982	2.648e-06	Enolase	Translation, post-translational modification, degradation ; Energy metabolism ; Carbon compound catabolism
PA4244	rplO	1.19841	4.41139e-06	50S ribosomal protein L15	Translation, post-translational modification, degradation
PA4250	rpsN	1.20028	4.4204e-06	30S ribosomal protein S14	Translation, post-translational modification, degradation
PA1337	ansB	1.20103	1.21662e-06	Glutaminase-asparaginase	Amino acid biosynthesis and metabolism
PA3126	ibpA	1.20197	3.03513e-06	Heat-shock protein IbpA	Chaperones & heat shock proteins
PA2779		1.20742	2.75051e-06	Hypothetical protein	Hypothetical, unclassified, unknown
PA2184		1.20987	2.98463e-06	Conserved hypothetical protein	Hypothetical, unclassified, unknown
PA3186	oprB	1.21239	8.98137e-07	Glucose/carbohydrate outer membrane porin OprB precursor	Transport of small molecules
PA2250	lpdV	1.21448	2.06868e-06	Lipoamide dehydrogenase-Val	Amino acid biosynthesis and metabolism ; Energy metabolism
PA2021		1.21456	2.51269e-06	Hypothetical protein	Hypothetical, unclassified, unknown
PA3686	adk	1.21854	1.39487e-06	Adenylate kinase	Nucleotide biosynthesis and metabolism
PA1557	ccoN2	1.2193	1.47205e-06	Cytochrome c oxidase, cbb3-type, CcoN subunit	Energy metabolism
PA3617	recA	1.22041	2.0958e-06	RecA protein	DNA replication, recombination, modification and repair
PA3836		1.22269	1.29546e-06	Hypothetical protein	Hypothetical, unclassified, unknown
PA2555		1.22591	4.15882e-07	Probable AMP-binding enzyme	Putative enzymes
PA4918	pcnA	1.22875	2.48525e-07	Nicotinamidase, PcnA	Hypothetical, unclassified, unknown
PA1341	aatQ	1.23	4.36739e-07	AatQ	Membrane proteins ; Transport of small molecules
PA5475		1.23643	1.33984e-06	Hypothetical protein	Hypothetical, unclassified, unknown
PA1471		1.23704	8.45596e-07	Hypothetical protein	Hypothetical, unclassified, unknown
PA5560	atpB	1.24057	8.17279e-07	ATP synthase A chain	Energy metabolism
PA4248	rplF	1.24646	2.34686e-06	50S ribosomal protein L6	Translation, post-translational modification, degradation
PA0867	mliC	1.24703	1.70614e-06	Membrane-bound lysozyme inhibitor of c-type lysozyme MliC	Hypothetical, unclassified, unknown ; Adaptation, Protection
PA3266	capB	1.24829	2.87429e-06	Cold acclimation protein B	Transcriptional regulators ; Adaptation, Protection
PA4671		1.25084	1.84298e-06	Probable ribosomal protein L25	Adaptation, Protection ; Translation, post-translational modification, degradation
PA0232	pcaC	1.25386	7.94273e-07	Gamma-carboxymuconolactone decarboxylase	Carbon compound catabolism
PA5110	fbp	1.25428	7.11205e-07	Fructose-1,6-bisphosphatase	Central intermediary metabolism ; Carbon compound catabolism
PA4909		1.25529	4.47504e-07	Probable ATP-binding component of ABC transporter	Transport of small molecules
PA4254	rpsQ	1.25776	1.54024e-06	30S ribosomal protein S17	Translation, post-translational modification, degradation
PA1761		1.26113	9.22062e-07	Hypothetical protein	Hypothetical, unclassified, unknown
PA3371		1.26618	8.83594e-07	Hypothetical protein	Hypothetical, unclassified, unknown
PA4431		1.26704	1.09564e-06	Probable iron-sulfur protein	Putative enzymes
PA3007	lexA	1.26915	6.25179e-07	Repressor protein LexA	Adaptation, Protection ; Translation, post-translational modification, degradation
PA3922		1.28149	5.57006e-07	Conserved hypothetical protein	Hypothetical, unclassified, unknown
PA4246	rpsE	1.28437	9.00501e-07	30S ribosomal protein S5	Translation, post-translational modification, degradation
PA2146		1.28502	1.47419e-06	Conserved hypothetical protein	Hypothetical, unclassified, unknown
PA5239	rho	1.29351	2.91518e-07	Transcription termination factor Rho	Transcription, RNA processing and degradation
PA4877		1.29501	7.53217e-08	Hypothetical protein	Hypothetical, unclassified, unknown
PA3531	bfrB	1.2985	7.9854e-07	Bacterioferritin	Transport of small molecules ; Adaptation, Protection
PA5192	pckA	1.3009	1.45118e-07	Phosphoenolpyruvate carboxykinase	Carbon compound catabolism ; Energy metabolism
PA4567	rpmA	1.30356	7.1336e-07	50S ribosomal protein L27	Translation, post-translational modification, degradation
PA0762	algU	1.30364	4.70331e-07	Sigma factor AlgU	Transcriptional regulators
PA0423	pasP	1.3044	6.50731e-07	PasP	Secreted Factors (toxins, enzymes, alginate)
PA0604	agtB	1.30665	3.09581e-07	AgtB	Transport of small molecules
PA2552		1.30815	1.69012e-07	Probable acyl-CoA dehydrogenase	Putative enzymes
PA5528		1.3112	1.04277e-07	Hypothetical protein	Membrane proteins
PA4025		1.31319	2.3967e-08	Probable ethanolamine ammonia-lyase light chain	Carbon compound catabolism
PA4171		1.31385	8.42483e-08	Probable protease	Putative enzymes
PA5435		1.31396	8.93846e-08	Probable transcarboxylase subunit	Central intermediary metabolism
PA2404	fpvH	1.31447	5.41482e-08	FpvH	Membrane proteins
PA3365		1.31467	3.27221e-08	Probable chaperone	Chaperones & heat shock proteins
PA2170		1.31725	5.97675e-07	Hypothetical protein	Hypothetical, unclassified, unknown
PA3262		1.3214	3.14373e-07	Probable peptidyl-prolyl cis-trans isomerase, FkbP-type	Translation, post-translational modification, degradation ; Chaperones & heat shock proteins
PA3822		1.32285	4.96342e-07	Conserved hypothetical protein	Hypothetical, unclassified, unknown
PA4275	nusG	1.32415	1.96809e-07	Transcription antitermination protein NusG	Transcription, RNA processing and degradation
PA4568	rplU	1.32852	2.65771e-07	50S ribosomal protein L21	Translation, post-translational modification, degradation
PA4247	rplR	1.33013	4.45762e-07	50S ribosomal protein L18	Translation, post-translational modification, degradation
PA3525	argG	1.33068	9.13388e-08	Argininosuccinate synthase	Amino acid biosynthesis and metabolism
PA0111		1.33105	1.57178e-08	Hypothetical protein	Hypothetical, unclassified, unknown
PA2553		1.33377	1.17036e-07	Probable acyl-CoA thiolase	Putative enzymes
PA0553		1.33936	4.53054e-07	Hypothetical protein	Hypothetical, unclassified, unknown
PA2288		1.3445	4.76517e-08	Hypothetical protein	Hypothetical, unclassified, unknown
PA4272	rplJ	1.347	3.49602e-07	50S ribosomal protein L10	Translation, post-translational modification, degradation
PA5471	armZ	1.34837	2.98352e-08	ArmZ	Hypothetical, unclassified, unknown
PA4257	rpsC	1.34909	3.24672e-07	30S ribosomal protein S3	Translation, post-translational modification, degradation
PA4765	omlA	1.34954	2.00041e-07	Outer membrane lipoprotein OmlA precursor	Membrane proteins ; Transport of small molecules
PA4260	rplB	1.35115	2.59111e-07	50S ribosomal protein L2	Translation, post-translational modification, degradation
PA5169	dctM	1.35505	2.07239e-08	DctM	Membrane proteins ; Transport of small molecules
PA5420	purU2	1.35593	5.07231e-08	Formyltetrahydrofolate deformylase	Nucleotide biosynthesis and metabolism
PA5419	soxG	1.356	3.80935e-08	Sarcosine oxidase gamma subunit	Amino acid biosynthesis and metabolism
PA0578		1.3582	7.72691e-08	Conserved hypothetical protein	Hypothetical, unclassified, unknown
PA2248	bkdA2	1.36136	1.66213e-07	2-oxoisovalerate dehydrogenase (beta subunit)	Amino acid biosynthesis and metabolism
PA0763	mucA	1.36202	1.19405e-07	Anti-sigma factor MucA	Transcriptional regulators ; Cell wall / LPS / capsule ; Secreted Factors (toxins, enzymes, alginate)
PA0376	rpoH	1.36335	1.95094e-07	Sigma factor RpoH	Transcriptional regulators
PA4407	ftsZ	1.37648	9.79952e-08	Cell division protein FtsZ	Cell division
PA3233		1.37682	3.1496e-09	Hypothetical protein	Hypothetical, unclassified, unknown
PA2830	htpX	1.3769	7.30583e-08	Heat shock protein HtpX	Adaptation, Protection
PA5417	soxD	1.38032	1.79803e-07	Sarcosine oxidase delta subunit	Amino acid biosynthesis and metabolism
PA0579	rpsU	1.38072	2.63397e-07	30S ribosomal protein S21	Translation, post-translational modification, degradation
PA2851	efp	1.39888	1.56106e-07	Translation elongation factor P	Translation, post-translational modification, degradation
PA4846	aroQ1	1.40145	2.17221e-07	3-dehydroquinate dehydratase	Amino acid biosynthesis and metabolism
PA2624	idh	1.40644	1.68379e-08	Isocitrate dehydrogenase	Energy metabolism
PA0766	mucD	1.42004	2.31338e-08	Serine protease MucD precursor	Putative enzymes ; Cell wall / LPS / capsule ; Secreted Factors (toxins, enzymes, alginate)
PA3940		1.43434	7.94719e-08	Probable DNA binding protein	DNA replication, recombination, modification and repair
PA4919	pncB1	1.43982	1.2848e-08	Nicotinate phosphoribosyltransferase	Biosynthesis of cofactors, prosthetic groups and carriers
PA2247	bkdA1	1.4417	2.81968e-08	2-oxoisovalerate dehydrogenase (alpha subunit)	Amino acid biosynthesis and metabolism
PA5418	soxA	1.44348	3.62486e-09	Sarcosine oxidase alpha subunit	Carbon compound catabolism
PA2509	catB	1.44651	6.53282e-10	Muconate cycloisomerase I	Carbon compound catabolism
PA3232		1.44791	4.72194e-09	Probable nuclease	Putative enzymes
PA2405	fpvJ	1.448	4.494e-09	FpvJ	Hypothetical, unclassified, unknown
PA2016	liuR	1.44918	7.09289e-07	Regulator of liu genes	Transcriptional regulators
PA1029		1.45834	3.9973e-08	Hypothetical protein	Hypothetical, unclassified, unknown
PA2015	liuA	1.46233	3.48133e-09	Putative isovaleryl-CoA dehydrogenase	Carbon compound catabolism
PA1588	sucC	1.46734	2.10172e-08	Succinyl-CoA synthetase beta chain	Energy metabolism
PA0537		1.47333	1.93065e-08	Conserved hypothetical protein	Hypothetical, unclassified, unknown
PA0113		1.47671	8.22843e-10	Probable cytochrome c oxidase assembly factor	Energy metabolism
PA2623	icd	1.47847	1.79089e-08	Isocitrate dehydrogenase	Carbon compound catabolism ; Amino acid biosynthesis and metabolism ; Energy metabolism
PA1288		1.47869	7.434e-09	Probable outer membrane protein precursor	Membrane proteins ; Transport of small molecules
PA1323		1.48625	8.38883e-09	Hypothetical protein	Hypothetical, unclassified, unknown
PA5471.1		1.49223	2.58239e-06	PA5471 leader peptide
PA5555	atpG	1.49894	1.43646e-08	ATP synthase gamma chain	Energy metabolism
PA2023	galU	1.50237	5.44446e-09	UTP-glucose-1-phosphate uridylyltransferase	Central intermediary metabolism
PA0038		1.50401	1.39697e-08	Hypothetical protein	Hypothetical, unclassified, unknown
PA1555	ccoP2	1.50528	2.69931e-09	Cytochrome c oxidase, cbb3-type, CcoP subunit	Energy metabolism
PA3819		1.50934	9.34061e-09	Conserved hypothetical protein	Membrane proteins
PA1589	sucD	1.51019	1.11793e-08	Succinyl-CoA synthetase alpha chain	Energy metabolism
PA2637	nuoA	1.51255	1.49867e-08	NaDH dehydrogenase I chain A	Energy metabolism
PA1340	aatM	1.52725	4.87512e-09	AatM	Transport of small molecules
PA4243	secY	1.52771	7.6711e-09	Secretion protein SecY	Membrane proteins ; Protein secretion/export apparatus
PA3656	rpsB	1.55552	4.39267e-09	30S ribosomal protein S2	Translation, post-translational modification, degradation
PA5380	gbdR	1.55837	8.74642e-10	GbdR	Transcriptional regulators
PA0226		1.5659	1.38896e-10	Probable CoA transferase, subunit A	Carbon compound catabolism
PA4249	rpsH	1.56944	4.7982e-09	30S ribosomal protein S8	Translation, post-translational modification, degradation
PA3370		1.57007	3.15316e-09	Hypothetical protein	Membrane proteins
PA4261	rplW	1.57206	3.45768e-09	50S ribosomal protein L23	Translation, post-translational modification, degradation
PA4932	rplI	1.58521	2.11286e-09	50S ribosomal protein L9	Translation, post-translational modification, degradation
PA5445		1.58592	1.39857e-10	Probable coenzyme A transferase	Putative enzymes
PA5545		1.59282	1.20659e-09	Conserved hypothetical protein	Hypothetical, unclassified, unknown
PA5111	gloA3	1.59502	9.35269e-10	Lactoylglutathione lyase	Central intermediary metabolism
PA1555.1	ccoQ2	1.59558	7.35343e-09	Cytochrome c oxidase, cbb3-type, CcoQ subunit
PA4507		1.6016	1.19458e-10	Hypothetical protein	Membrane proteins
PA4262	rplD	1.60915	1.17293e-09	50S ribosomal protein L4	Transcription, RNA processing and degradation ; Translation, post-translational modification, degradation
PA3742	rplS	1.61458	1.97907e-09	50S ribosomal protein L19	Translation, post-translational modification, degradation
PA2386	pvdA	1.61651	6.18953e-11	L-ornithine N5-oxygenase	Adaptation, Protection
PA5416	soxB	1.62418	3.51138e-11	Sarcosine oxidase beta subunit	Amino acid biosynthesis and metabolism
PA3629	adhC	1.62708	5.60233e-10	Alcohol dehydrogenase class III	Central intermediary metabolism
PA4935	rpsF	1.63843	8.64697e-10	30S ribosomal protein S6	Translation, post-translational modification, degradation
PA1324		1.65548	3.62055e-10	Hypothetical protein	Hypothetical, unclassified, unknown
PA2008	fahA	1.65676	1.57395e-10	Fumarylacetoacetase	Carbon compound catabolism
PA4276	secE	1.65683	4.75188e-10	Secretion protein SecE	Protein secretion/export apparatus
PA3743	trmD	1.65966	1.15984e-10	tRNA (guanine-N1)-methyltransferase	Transcription, RNA processing and degradation
PA3923		1.65995	2.35376e-10	Hypothetical protein	Hypothetical, unclassified, unknown
PA1556	ccoO2	1.66117	1.57704e-10	Cytochrome c oxidase, cbb3-type, CcoO subunit	Energy metabolism
PA5411	gbcB	1.66249	4.38947e-11	GbcB	Amino acid biosynthesis and metabolism
PA1342	aatJ	1.66684	2.55943e-10	AatJ	Transport of small molecules
PA2007	maiA	1.6709	1.26261e-10	Maleylacetoacetate isomerase	Carbon compound catabolism
PA2169		1.67479	2.10879e-10	Hypothetical protein	Hypothetical, unclassified, unknown
PA5377	cbcW	1.67629	4.4723e-11	CbcW	Membrane proteins ; Transport of small molecules
PA4263	rplC	1.67679	3.14506e-10	50S ribosomal protein L3	Translation, post-translational modification, degradation
PA4934	rpsR	1.67936	4.73183e-10	30S ribosomal protein S18	Translation, post-translational modification, degradation
PA2516	xylZ	1.69139	2.96218e-12	Toluate 1,2-dioxygenase electron transfer component	Energy metabolism ; Carbon compound catabolism
PA2190		1.69245	1.06435e-10	Conserved hypothetical protein	Hypothetical, unclassified, unknown
PA5415	glyA1	1.71602	9.37473e-12	Serine hydroxymethyltransferase	Amino acid biosynthesis and metabolism
PA1983	exaB	1.7314	6.34123e-12	Cytochrome c550	Energy metabolism ; Carbon compound catabolism
PA2514	antC	1.74209	3.05973e-11	Anthranilate dioxygenase reductase	Carbon compound catabolism
PA5315	rpmG	1.7564	1.28369e-10	50S ribosomal protein L33	Translation, post-translational modification, degradation
PA4147	acoR	1.77366	9.53226e-13	Transcriptional regulator AcoR	Transcriptional regulators
PA4913		1.77852	6.04024e-12	Probable binding protein component of ABC transporter	Transport of small molecules
PA2754		1.77998	1.40192e-11	Conserved hypothetical protein	Hypothetical, unclassified, unknown
PA5168	dctQ	1.78083	1.9138e-12	DctQ	Membrane proteins ; Transport of small molecules
PA2134		1.78541	4.68452e-12	Hypothetical protein	Hypothetical, unclassified, unknown
PA4876	osmE	1.79494	2.4864e-11	Osmotically inducible lipoprotein OsmE	Membrane proteins ; Adaptation, Protection
PA0865	hpd	1.81184	1.04383e-11	4-hydroxyphenylpyruvate dioxygenase	Amino acid biosynthesis and metabolism
PA2398	fpvA	1.82841	1.02625e-13	Ferripyoverdine receptor	Transport of small molecules
PA2159		1.83019	1.01704e-12	Conserved hypothetical protein	Hypothetical, unclassified, unknown
PA3569	mmsB	1.8347	1.83367e-12	3-hydroxyisobutyrate dehydrogenase	Carbon compound catabolism
PA4738		1.84101	7.62823e-12	Conserved hypothetical protein	Hypothetical, unclassified, unknown
PA0519	nirS	1.85139	1.72112e-13	Nitrite reductase precursor	Energy metabolism
PA5212		1.88046	7.24726e-13	Hypothetical protein	Hypothetical, unclassified, unknown
PA4739		1.88201	2.59744e-12	Conserved hypothetical protein	Hypothetical, unclassified, unknown
PA4024	eutB	1.88491	3.56081e-14	Ethanolamine ammonia-lyase large subunit	Central intermediary metabolism
PA3691		1.89648	9.31852e-13	Hypothetical protein	Hypothetical, unclassified, unknown
PA4433	rplM	1.90616	1.0046e-12	50S ribosomal protein L13	Translation, post-translational modification, degradation
PA2513	antB	1.9161	6.69438e-13	Anthranilate dioxygenase small subunit	Carbon compound catabolism
PA5376	cbcV	1.92486	2.26841e-13	CbcV	Transport of small molecules
PA0059	osmC	1.93589	2.92977e-13	Osmotically inducible protein OsmC	Adaptation, Protection
PA4933		1.94505	1.35644e-13	Hypothetical protein	Membrane proteins
PA4670	prs	1.95558	1.26369e-13	Ribose-phosphate pyrophosphokinase	Carbon compound catabolism ; Nucleotide biosynthesis and metabolism
PA5378	cbcX	1.9777	7.74237e-14	CbcX	Hypothetical, unclassified, unknown
PA5316	rpmB	1.97816	2.05117e-13	50S ribosomal protein L28	Translation, post-translational modification, degradation
PA4432	rpsI	1.97982	3.96345e-13	30S ribosomal protein S9	Translation, post-translational modification, degradation
PA3692	lptF	2.00733	5.3013e-14	Lipotoxon F, LptF	Membrane proteins ; Transport of small molecules
PA5398	dgcA	2.07024	1.55991e-15	DgcA, Dimethylglycine catabolism	Amino acid biosynthesis and metabolism
PA5348		2.08416	1.46601e-14	Probable DNA-binding protein	DNA replication, recombination, modification and repair
PA2166		2.09005	1.25065e-14	Hypothetical protein	Hypothetical, unclassified, unknown
PA3366	amiE	2.09142	2.61956e-15	Aliphatic amidase	Carbon compound catabolism
PA3369		2.0945	1.19196e-14	Hypothetical protein	Membrane proteins
PA2171		2.09845	3.03329e-15	Hypothetical protein	Hypothetical, unclassified, unknown
PA5396		2.10647	1.69488e-15	Hypothetical protein	Hypothetical, unclassified, unknown
PA2009	hmgA	2.11568	2.10683e-15	Homogentisate 1,2-dioxygenase	Carbon compound catabolism
PA2512	antA	2.13503	2.40661e-15	Anthranilate dioxygenase large subunit	Carbon compound catabolism
PA2682		2.15329	3.85847e-16	Conserved hypothetical protein	Putative enzymes
PA3582	glpK	2.20372	8.6033e-18	Glycerol kinase	Central intermediary metabolism
PA0958	oprD	2.21357	2.0199e-16	Basic amino acid, basic peptide and imipenem outer membrane porin OprD precursor	Transport of small molecules
PA4880		2.23258	1.13134e-16	Probable bacterioferritin	Central intermediary metabolism
PA2433		2.24601	5.59528e-17	Hypothetical protein	Hypothetical, unclassified, unknown
PA3570	mmsA	2.25276	5.74885e-17	Methylmalonate-semialdehyde dehydrogenase	Amino acid biosynthesis and metabolism ; Carbon compound catabolism
PA5167	dctP	2.26199	1.963e-17	DctP	Membrane proteins ; Transport of small molecules
PA5481		2.28088	1.94737e-17	Hypothetical protein	Hypothetical, unclassified, unknown
PA4023		2.28229	1.19729e-19	Probable transport protein	Transport of small molecules
PA1592		2.29431	1.62983e-17	Hypothetical protein	Hypothetical, unclassified, unknown
PA5397		2.30657	1.90223e-17	Hypothetical protein	Hypothetical, unclassified, unknown
PA5421	fdhA	2.39949	3.17929e-19	Glutathione-independent formaldehyde dehydrogenase	Central intermediary metabolism
PA2762		2.43651	6.65192e-19	Hypothetical protein	Hypothetical, unclassified, unknown
PA4336		2.44615	4.2214e-20	Conserved hypothetical protein	Hypothetical, unclassified, unknown
PA4563	rpsT	2.47876	3.53826e-17	30S ribosomal protein S20	Central intermediary metabolism ; Translation, post-translational modification, degradation
PA1982	exaA	2.49022	2.16363e-22	Quinoprotein ethanol dehydrogenase	Carbon compound catabolism
PA3236	betX	2.55181	1.71926e-21	BetX	Adaptation, Protection ; Transport of small molecules
PA4335		2.56696	6.32648e-21	Hypothetical protein	Hypothetical, unclassified, unknown
PA0355	pfpI	2.59263	4.65836e-21	Protease PfpI	Translation, post-translational modification, degradation
PA2747		2.66323	6.24841e-22	Hypothetical protein	Hypothetical, unclassified, unknown
PA5410	gbcA	2.66832	1.20889e-22	GbcA	Amino acid biosynthesis and metabolism
PA4152		2.68492	3.54276e-25	Probable hydrolase	Carbon compound catabolism
PA2518	xylX	2.72797	2.19463e-25	Toluate 1,2-dioxygenase alpha subunit	Carbon compound catabolism
PA2862	lipA	2.73648	1.86772e-24	Lactonizing lipase precursor	Carbon compound catabolism ; Secreted Factors (toxins, enzymes, alginate)
PA5482		2.73967	5.88686e-22	Hypothetical protein	Membrane proteins
PA2517	xylY	2.7521	6.47971e-25	Toluate 1,2-dioxygenase beta subunit	Carbon compound catabolism
PA4150		2.76906	4.57313e-26	Probable dehydrogenase E1 component	Carbon compound catabolism
PA0866	aroP2	2.7797	4.8181e-25	Aromatic amino acid transport protein AroP2	Transport of small molecules
PA3568		2.80473	7.45211e-26	Probable acetyl-coa synthetase	Putative enzymes
PA4153		2.85368	1.79534e-27	2,3-butanediol dehydrogenase	Carbon compound catabolism
PA0107		2.91439	2.1638e-26	Conserved hypothetical protein	Energy metabolism
PA3205		3.08615	6.50605e-29	Hypothetical protein	Hypothetical, unclassified, unknown
PA2508	catC	3.28442	1.82037e-31	Muconolactone delta-isomerase	Carbon compound catabolism
PA4151	acoB	3.36621	4.18395e-35	Acetoin catabolism protein AcoB	Carbon compound catabolism
PA2507	catA	3.40235	3.52826e-35	Catechol 1,2-dioxygenase	Carbon compound catabolism
PA2027		3.49692	3.55854e-36	Hypothetical protein	Hypothetical, unclassified, unknown
PA0108	coIII	3.52832	1.78046e-35	Cytochrome c oxidase, subunit III	Energy metabolism
PA0106	coxA	3.53141	1.95938e-36	Cytochrome c oxidase, subunit I	Energy metabolism
PA0105	coxB	3.55699	1.89456e-36	Cytochrome c oxidase, subunit II	Energy metabolism
PA0887	acsA	3.57026	2.12449e-37	Acetyl-coenzyme A synthetase	Carbon compound catabolism ; Central intermediary metabolism
PA3234		3.7511	1.75471e-40	Probable sodium:solute symporter	Membrane proteins ; Transport of small molecules
PA1984	exaC	3.8182	2.34799e-41	NaD+ dependent aldehyde dehydrogenase ExaC	Putative enzymes
PA1190		4.02918	8.02936e-44	Conserved hypothetical protein	Membrane proteins
PA4022	hdhA	4.50576	5.25374e-51	Hydrazone dehydrogenase, HdhA	Putative enzymes
PA3235		4.5064	1.38726e-49	Conserved hypothetical protein	Membrane proteins
PA3038	opdQ	4.54256	1.31178e-52	OpdQ	Transport of small molecules
